# Supplementary material for: Baseline characteristics, survival and direct costs associated to treatment of gastric cancer patients at the National Oncology Institute of Panama from 2012 to 2015: a hospital-based observational study
Source: PubMed Central journal article supplement — BMJ Open. 2017 Sep 24;7(9):e017266. doi: 10.1136/bmjopen-2017-017266 (PMC5623512; doi:10.1136/bmjopen-2017-017266), 2017-09-24
Supplement: bmjopen-2017-017266.draft_revisions.pdf [file bmjopen-2017-017266.draft_revisions.pdf]

# BMJ Open

BMJ Open is committed to open peer review. As part of this commitment we make the peer review history of every article we publish publicly available.

When an article is published we post the peer reviewers' comments and the authors' responses online. We also post the versions of the paper that were used during peer review. These are the versions that the peer review comments apply to.

The versions of the paper that follow are the versions that were submitted during the peer review process. They are not the versions of record or the final published versions. They should not be cited or distributed as the published version of this manuscript.

BMJ Open is an open access journal and the full, final, typeset and author-corrected version of record of the manuscript is available on our site with no access controls, subscription charges or pay-per-view fees (<http://bmjopen.bmj.com>).

If you have any questions on BMJ Open's open peer review process please email [editorial.bmjopen@bmj.com](mailto:editorial.bmjopen@bmj.com)

# BMJ Open

## Epidemiology, mortality and direct costs associated to treatment of gastric cancer patients at the National Oncology Institute of Panama from 2012 to 2015: a hospital-based observational study.

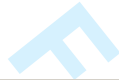

|                                 |                                                                                                                                                                                                                                                                                                                                                                                                                                                                                                                                                                                                                                                                                                                                                                                                                                                                                                                                                                                                                                                                                                                                                                                                                    |
|---------------------------------|--------------------------------------------------------------------------------------------------------------------------------------------------------------------------------------------------------------------------------------------------------------------------------------------------------------------------------------------------------------------------------------------------------------------------------------------------------------------------------------------------------------------------------------------------------------------------------------------------------------------------------------------------------------------------------------------------------------------------------------------------------------------------------------------------------------------------------------------------------------------------------------------------------------------------------------------------------------------------------------------------------------------------------------------------------------------------------------------------------------------------------------------------------------------------------------------------------------------|
| Journal:                        | <i>BMJ Open</i>                                                                                                                                                                                                                                                                                                                                                                                                                                                                                                                                                                                                                                                                                                                                                                                                                                                                                                                                                                                                                                                                                                                                                                                                    |
| Manuscript ID                   | bmjopen-2017-017266                                                                                                                                                                                                                                                                                                                                                                                                                                                                                                                                                                                                                                                                                                                                                                                                                                                                                                                                                                                                                                                                                                                                                                                                |
| Article Type:                   | Research                                                                                                                                                                                                                                                                                                                                                                                                                                                                                                                                                                                                                                                                                                                                                                                                                                                                                                                                                                                                                                                                                                                                                                                                           |
| Date Submitted by the Author:   | 11-Apr-2017                                                                                                                                                                                                                                                                                                                                                                                                                                                                                                                                                                                                                                                                                                                                                                                                                                                                                                                                                                                                                                                                                                                                                                                                        |
| Complete List of Authors:       | Castro, Franz; Instituto Conmemorativo Gorgas de Estudios de la Salud, Department of Research and Health Technology Assessment<br>Shahal, David; Instituto Conmemorativo Gorgas de Estudios de la Salud, Department of Research and Health Technology Assessment<br>Tarajia, Musharaf; Instituto Conmemorativo Gorgas de Estudios de la Salud, Department of Research and Health Technology Assessment<br>Moreno Velásquez, Ilais; Instituto Conmemorativo Gorgas de Estudios de la Salud, Department of Research and Health Technology Assessment<br>Tribaldos Causadias, Maribel; Instituto Conmemorativo Gorgas de Estudios de la Salud, Department of Research and Health Technology Assessment<br>Herrera, Víctor; Instituto Conmemorativo Gorgas de Estudios de la Salud, Department of Research and Health Technology Assessment<br>Gómez, Beatriz; Instituto Conmemorativo Gorgas de Estudios de la Salud, Department of Research and Health Technology Assessment<br>Cukier, Moisés; National Oncology Institute<br>Motta, Jorge; Instituto Conmemorativo Gorgas de Estudios de la Salud, Department of Research and Health Technology Assessment; Secretaria Nacional de Ciencia Tecnología e Innovación |
| <b>Primary Subject Heading</b>: | Global health                                                                                                                                                                                                                                                                                                                                                                                                                                                                                                                                                                                                                                                                                                                                                                                                                                                                                                                                                                                                                                                                                                                                                                                                      |
| Secondary Subject Heading:      | Gastroenterology and hepatology                                                                                                                                                                                                                                                                                                                                                                                                                                                                                                                                                                                                                                                                                                                                                                                                                                                                                                                                                                                                                                                                                                                                                                                    |
| Keywords:                       | Gastric cancer, Epidemiology < ONCOLOGY, Mortality, Health care costs, Panama                                                                                                                                                                                                                                                                                                                                                                                                                                                                                                                                                                                                                                                                                                                                                                                                                                                                                                                                                                                                                                                                                                                                      |
|                                 |                                                                                                                                                                                                                                                                                                                                                                                                                                                                                                                                                                                                                                                                                                                                                                                                                                                                                                                                                                                                                                                                                                                                                                                                                    |

SCHOLARONE™  
Manuscripts

# Epidemiology, mortality and direct costs associated to treatment of gastric cancer patients at the National Oncology Institute of Panama from 2012 to 2015: a hospital-based observational study.

Franz Castro MD<sup>1,2</sup>, David Shahal MD<sup>1,2</sup>, Musharaf Tarajia MD<sup>2</sup>, Ilais Moreno Velásquez MD PhD<sup>2</sup>, Maribel Tribaldos Causadias MD PhD<sup>2</sup>, Víctor Herrera MSc<sup>2</sup>, Beatriz Gómez MSc<sup>2</sup>, Moisés Cukier MD<sup>3</sup>, Jorge Motta MD MPH<sup>2,4</sup>

<sup>1</sup>Franz Castro and David Shahal equally contributed to this study.

<sup>2</sup>Department of Research and Health Technology Assessment, Gorgas Memorial Institute for Health Studies, Panama City, Panama

<sup>3</sup>Division of Surgical Oncology, National Oncology Institute, Panama City, Panama

<sup>4</sup>National Secretariat for Science and Technology, Panama City, Panama

Correspondence to:

David Shahal

Department of Research and Health Technology Assessment, Gorgas Memorial Institute for Health Studies, Panama City, Panama; (e-mail: davidshahal@gmail.com)

Abstract word count: 292 words.

Manuscript word count: 3548 words.

Tables and figures count: 4 tables, 1 figure.

Keywords: Gastric cancer; Epidemiology; Mortality; Health care costs; Panama.

## Abstract

Objectives: Comprehensive epidemiological and economical studies of gastric cancer (GC) in Panama are limited. This study aims to evaluate the association between socioeconomic and clinical variables with all-cause mortality, describe the survival outcomes according to clinical stage, and estimate the direct costs associated to GC care in a Panamanian population with GC.

Design and setting: A retrospective observational study was conducted at the leading public institution for cancer treatment in Panama.

Participants: Data was obtained from 611 records of patients diagnosed with gastric adenocarcinoma (codes C16.0-C16.9 of the International Classification of Diseases 10th revision, ICD-10), attended between January 1<sup>st</sup>, 2012 and December 31<sup>st</sup>, 2015.

Methods: Cox proportional hazards models were used to calculate hazard ratios (HR) with 95% confidence intervals (95%CI) to examine associations between the variables and all-cause mortality. Kaplan-Meier curves were used to assess overall and stage-specific survival. Direct costs (based on 2015 USD) were calculated per patient using standard costs provided by the institution for hospital admission (occupied bed-days), radiotherapy, surgery and chemotherapy, yielding total and overall mean costs (OMC). A comparison of OMC between groups (sex, social security status, clinical stage) was performed applying the bootstrap method with a t-test of unequal variances.

Results: An increased mortality risk was observed for patients without social security coverage (HR: 2.02; 95%CI: 1.16-3.53), overlapping tumors (HR: 1.50; 95%CI: 1.02-2.22), poorly-differentiated tumors (HR: 2.27; 95%CI: 1.22-4.22), and stage IV disease (HR: 5.54; 95%CI: 3.38-9.08) (adjusted models). Overall one-year survival rate was 41%. The estimated OMC of GC care per patient was 4,259 USD. No statistically significant differences were found between OMC.

Conclusions: Socioeconomic disparities influence GC outcomes and healthcare utilization. Policies addressing healthcare disparities related to GC are needed, as well as in-depth studies evaluating barriers of access to GC related services.

1  
2  
3  
4  
5 Article summary:  
6

7 Strengths and limitations of this study:  
8

- 9
- 10 • This is the first study in Panama assessing epidemiology and mortality of
  - 11 gastric cancer (GC), as well as costs related to its care.
  - 12 • The results reflect the impact of socioeconomic determinants in GC outcomes,
  - 13 having implications for policymakers in Panama.
  - 14 • Strengths of this study include:
    - 15 ○ Mortality data was ascertained with the National Mortality Registry.
    - 16 ○ The use of actual chemotherapeutic doses administered allowed a more
    - 17 accurate calculation of medication costs.
    - 18 ○ Applying the bootstrap method for mean cost comparison purposes
    - 19 provided us with a more flexible tool to compare costs.
    - 20
    - 21
    - 22
  - 23 • Limitations of this study include:
    - 24 ○ This study encompassed patients from a single cancer institution and
    - 25 our results cannot be extrapolated to the whole population, however,
    - 26 the National Oncology Institute of Panama is the biggest and main
    - 27 cancer referral public hospital in the country.
    - 28
    - 29 ○ There was a considerable amount of underreporting and missing
    - 30 variables such as incomplete data regarding chemotherapy protocol
    - 31 sessions, resource utilization and outpatient expenses, which most
    - 32 likely led to underestimation of costs.
    - 33
    - 34
    - 35
    - 36
    - 37
    - 38
    - 39
    - 40
    - 41
    - 42
    - 43
    - 44
    - 45
    - 46
    - 47
    - 48
    - 49
    - 50
    - 51
    - 52
    - 53
    - 54
    - 55
    - 56
    - 57
    - 58
    - 59
    - 60

## 1. Introduction

Latin-America presents one of the highest incidences of Gastric Cancer (GC) worldwide.<sup>1</sup> In 2011, GC was responsible for the sixth highest incidence, and the highest mortality rate from cancer in Panama.<sup>2</sup> Although GC treatment is evolving rapidly at the expense of increasing costs of care, there is scarcity of comprehensive epidemiological and economical studies of GC in the region.<sup>3</sup>

Understanding the epidemiology of GC and its costs in low-and middle-income countries is a crucial step to addressing the burden of GC and will guide disease surveillance, screening, prevention activities as well as healthcare resource allocation. Thus, the aims of this study were to evaluate the association between socioeconomic and clinical variables with all-cause mortality, describe the survival outcomes according to clinical stage, and describe the direct costs associated to GC care in a Panamanian population with GC.

## 2. Methods

### 2.1. Study population

A descriptive, hospital-based retrospective study was conducted at the National Oncology Institute (NOI). The NOI is the leading public institution for cancer treatment in Panama, receiving cases referred from all over the country.<sup>4 5</sup>

Data derived from patient records (electronic and paper-based) with a histopathological diagnosis of gastric adenocarcinoma having their first appointment at the NOI between January 1st, 2012 and December 31st, 2015 was retrieved. Cases were registered according to codes C16.0 to C16.9 based on the tenth revision of the International Classification of Diseases (ICD-10).

A list containing 697 patients was provided by the Department of Clinical Files at the NOI. A total of 12 clinical records could not be located and were therefore excluded. Of the remaining 685 records, those with a diagnosis different from gastric adenocarcinoma were excluded (mucosa-associated lymphoid tissue (MALT) lymphomas, gastrointestinal stromal tumors (GIST), neuroendocrine tumors (NETs), sarcomas, as well as tumors confirmed to be from a different primary site (e.g., esophageal), for a total study population of 611 patients (Supplementary Figure 1).

All-cause mortality from 2012 to 2015 was verified with the National Mortality Registry (NMR) supplied by the National Institute of Statistics and Census of Panama (Instituto Nacional de Estadística y Censo, INEC). The research protocol was approved by the Gorgas Memorial Institute Ethics Committee and the Ministry of Health.

## 2.2. Study variables

Socioeconomic (sex, age at diagnosis, social security status, employment status, marital status, province of residence, ethnicity) and clinical variables (location by endoscopy, histological type, tumor grade and clinical stage) were recorded. Costs were ascertained using length of stay in hospital, surgical procedures performed, chemotherapy and radiotherapy received.

Age at diagnosis was categorized considering the cutoff value of 45 years for early onset GC (EOGC), as done in previous studies,<sup>6</sup> and age strata as reported by the Surveillance, Epidemiology, and End Results (SEER).<sup>7</sup> Social security status was categorized as having or not coverage by health institutions of the Panamanian Social Insurance Fund, in which a monthly amount is discounted from contributors' salaries (active public and private workforce) in order to receive health coverage for them and their first degree relatives, allowing children and unemployed adults to have coverage (beneficiaries). The Social Insurance Fund also serves as a retirement fund for workers at a certain age (retired), or in case of permanent disability (pensioners). The NOI is not an institution from the Panamanian Social Insurance Fund, but patients with social security are granted free healthcare services, while those without social security are required to pay out-of-pocket fees.<sup>8</sup>

Provinces of residence were grouped according to geographic proximity to the NOI and common socioeconomic characteristics,<sup>9</sup> and categorized as Panama and Colon, Veraguas and Cocle, Herrera and Los Santos and Other provinces (Bocas del Toro, Chiriqui, Darien, Guna Yala, Ngäbe-Bugle).

Anatomic location of the tumor was based on endoscopic reports and categorized as non-cardia, cardia and overlapping. Cases in which the endoscopic report could not be found in the clinical files were labeled as "unspecified".<sup>10</sup> Histological type was based on the Lauren classification (intestinal, diffuse),<sup>11</sup> and mixed tumors were shown as a different category.<sup>12</sup> Tumor grade was categorized using ICD for Oncology (ICD-O), and clinical stage was based on the 7th edition of the TNM Staging System of the American Joint Committee on Cancer (AJCC), taking into consideration the first staging reported in the clinical file by the physician at the NOI.<sup>13</sup>

Type of care was defined according to hospital admission (recorded as occupied bed days), radiotherapy (number of sessions), surgery and chemotherapy. Surgery was defined as the performance of gastrectomy (total, subtotal) with lymph node resection, gastroenteric anastomosis, stent placement (esophageal, duodenal) or exploratory laparotomy. Chemotherapy regimens for GC were based on the latest National Comprehensive Cancer Network (NCCN) guidelines.

Because the intention of treatment (e.g., curative vs palliative) was under-reported in the patient records, and due to the possibility of non-completion of regimens (loss to follow-up or death) or change in the regimen received (e.g., progression of disease,

1  
2  
3 differences between clinical TNM and pathological TNM), expenditure on  
4 chemotherapy was calculated using actual medication doses and sessions  
5 administered on an individual basis instead of assuming completion of a single,  
6 invariable regimen.  
7  
8

### 9 2.3. Statistical analyses

10  
11 Qualitative variables were expressed as percentages. As a complementary analysis,  
12 cases per 100,000 population were calculated for each province individually, using  
13 population data from the INEC.<sup>14</sup> Kaplan Meier curves were used to examine overall  
14 survival for all patients and for each clinical stage group. Median survival and median  
15 follow-up times in days were calculated and one-year survival rates were reported.  
16  
17

18  
19 Cox proportional hazards models were used to examine the association between  
20 socioeconomic and clinical variables with all-cause mortality. Crude hazard ratios  
21 (HR) and 95% confidence intervals (95% CI) were estimated. Adjusted models  
22 including all variables were also performed, in order to evaluate their impact on the  
23 results obtained. Ethnicity was evaluated, however excluded from the final model due  
24 to the high admixture of the Panamanian population. Due to statistical power,  
25 provinces of residence were grouped as previously mentioned. In order to avoid  
26 collinearity, we performed sensitivity analyses by running two different adjusted  
27 models, one including tumor grade but not histological type, and other including  
28 histological type but not tumor grade, observing similar point estimates. The  
29 assumption of proportional risk was verified using the Schoenfeld residuals method.  
30  
31  
32

33  
34 Total direct costs of care, expressed in US dollars (USD), were calculated per  
35 patient and for the whole study population using standard unit costs provided by the  
36 NOI and the Ministry of Health. Since no variation in costs was seen along the 2012-  
37 2015 period, calculations were based on 2015 estimates.  
38

39  
40 Total and mean direct costs were calculated according to social security status,  
41 sex, and clinical stage. Overall mean cost (OMC) comparisons among groups were  
42 performed using the bootstrap method.<sup>15</sup> This involved repeated resampling (1000  
43 repetitions) of the original cost data by random selection. After resampling, a t-test  
44 with unequal variances was conducted to compare means and a p-value was reported.  
45

46  
47 Statistical analyses were performed using SPSS 20.0 and Stata 14.0.  
48

## 49 3. Results

50  
51  
52 Table 1 shows the socioeconomic and clinical variables of the study population.  
53 Overall, 62.2% of the total population were males, 77.4% had social security and  
54 34.9% were unemployed. The group of provinces of Panama and Colon reported the  
55 highest number of patients (64.5%). According to age groups, 14.7% were younger  
56 than 45 years old, whereas 26.0% were  $\geq 75$  years old. Median (interquartile range)  
57  
58  
59  
60



age at diagnosis was 65 (52-75) years. Regarding the complementary analysis, when calculating the number of cases per 100,000 population by province separately, Herrera had 8.29 cases per 100,000, followed by Veraguas with 6.58. Among patients where ethnicity was reported (n=608), 83.2% patients were registered as Mestizo.

Based on endoscopic findings, tumors were most commonly reported as overlapping, observed in 46% of the patients. According to the histological classification, a predominance of intestinal type adenocarcinomas was observed (53.7%). Poorly differentiated tumors were observed in 62.3% of patients. Out of the 611 patients, 52.9% had the clinical stage recorded. From these cases, 4.6% were categorized as stage I, 13.9% as stage II, 15.8% and 65.6% as stage III and IV, respectively.

**Table 1**  
Socioeconomic and clinical variables of patients with gastric cancer treated at the NOI. 2012-2015.

| Socioeconomic and clinical variables | n       | %    |
|--------------------------------------|---------|------|
| Sex                                  |         |      |
| Female                               | 231/611 | 37.8 |
| Male                                 | 380/611 | 62.2 |
| Age                                  |         |      |
| Less than 45 years                   | 90/611  | 14.7 |
| 45-64 years                          | 207/611 | 33.9 |
| 65-74 years                          | 155/611 | 25.4 |
| 75 years or more                     | 159/611 | 26.0 |
| Social security status               |         |      |
| With social security                 | 473/611 | 77.4 |
| Without social security              | 138/611 | 22.6 |
| Employment status <sup>a</sup>       |         |      |
| Formal employment                    | 116/610 | 19.0 |
| Informal employment                  | 119/610 | 19.5 |
| Retired/pensioner                    | 162/610 | 26.6 |
| Unemployed                           | 213/610 | 34.9 |
| Marital status <sup>b</sup>          |         |      |
| Married/common law marriage          | 397/610 | 65.1 |
| Single                               | 161/610 | 26.4 |
| Widowed                              | 52/610  | 8.5  |
| Province of residence                |         |      |
| Panama and Colon                     | 394/611 | 64.5 |
| Veraguas and Coele                   | 118/611 | 19.3 |
| Herrera and Los Santos               | 57/611  | 9.3  |
| Other provinces <sup>c</sup>         | 42/611  | 6.9  |
| Ethnicity <sup>d</sup>               |         |      |
| White                                | 71/608  | 11.7 |
| Mestizo/Afrocaribbean/Indigenous     | 537/608 | 88.3 |
| Anatomic location by endoscopy       |         |      |
| Non-cardia                           | 239/611 | 39.1 |
| Cardia                               | 69/611  | 11.3 |

|                                |         |      |
|--------------------------------|---------|------|
| Overlapping                    | 281/611 | 46.0 |
| Unspecified                    | 22/611  | 3.6  |
| Histologic type <sup>c</sup>   |         |      |
| Intestinal type                | 232/432 | 53.7 |
| Diffuse type                   | 154/432 | 35.6 |
| Mixed type                     | 46/432  | 10.6 |
| Tumor grade <sup>f</sup>       |         |      |
| Well/moderately differentiated | 223/592 | 37.7 |
| Poorly differentiated          | 369/592 | 62.3 |
| Clinical stage <sup>g</sup>    |         |      |
| I-III                          | 111/323 | 34.4 |
| IV                             | 212/323 | 65.6 |

<sup>a</sup>Employment status: 1 missing; <sup>b</sup>Marital status: 1 missing; <sup>c</sup>Other provinces: 7 from Bocas del Toro, 20 from Chiriqui, 12 from Darien, 1 from Guna Yala, and 2 from Ngäbe-Bugle; <sup>d</sup>Ethnicity: only 23 afrocaribbean and 8 indigenous patients reported, 3 missing; <sup>e</sup>Histologic type: 179 missing; <sup>f</sup>Tumor grade: only 1 undifferentiated, 18 missing; <sup>g</sup>Clinical stage: 288 missing.

### 3.1. Mortality

In total, n=407 (67.5%) patients died of any cause during the study period. Figure 1 shows overall and stage-specific survival curves. Overall one-year survival rate was 41%, median survival was 287 days (9.5 months) and median follow-up was 604 days (20.1 months). Patients with stage I disease had a one-year survival rate of 93%, whereas stages II, III and IV presented a 78%, 76% and 38% one-year survival rate, respectively.

Table 2 presents the associations between socioeconomic and clinical variables with all-cause mortality. In the adjusted models, patients without social security presented a higher all-cause mortality risk (HR: 2.02; 95% CI: 1.16-3.53) compared to those with social security. Regarding anatomic location, having an overlapping tumor was related with an increased risk of dying (HR: 1.50; 95% CI: 1.02-2.22) in comparison to non-cardia tumors. Poorly differentiated tumors were associated with a higher all-cause mortality risk (HR: 2.27; 95% CI: 1.22-4.22) compared to well/moderately differentiated tumors, as well as those with stage IV disease (HR: 5.54; 95% CI: 3.38-9.08) in comparison to stage I-III disease.

**Table 2**

Cox proportional hazards models for the associations between socioeconomic and clinical variables with gastric cancer mortality in patients treated at the NOI, 2012-2015.

| Socioeconomic and clinical variables        | Crude HR                |                                | Adjusted HR             |                                |
|---------------------------------------------|-------------------------|--------------------------------|-------------------------|--------------------------------|
|                                             | HR                      | 95% CI                         | HR                      | 95% CI                         |
| Sex                                         |                         |                                |                         |                                |
| Female                                      | Reference               |                                | Reference               |                                |
| Male                                        | 0.93                    | (0.70-2.13)                    | 0.67                    | (0.41-1.01)                    |
| Age                                         |                         |                                |                         |                                |
| 45-64 years                                 | Reference               |                                | Reference               |                                |
| Less than 45 years                          | 1.43                    | (0.96-2.13)                    | 0.91                    | (0.53-1.58)                    |
| 65-74 years                                 | 0.90                    | (0.61-1.32)                    | 0.66                    | (0.38-1.16)                    |
| 75 years or more                            | 1.14                    | (0.78-1.68)                    | 1.68                    | (0.91-3.10)                    |
| Social security status                      |                         |                                |                         |                                |
| With social security                        | Reference               |                                | Reference               |                                |
| Without social security                     | <b>1.44<sup>f</sup></b> | <b>(1.01-2.05)<sup>f</sup></b> | <b>2.02<sup>f</sup></b> | <b>(1.16-3.53)<sup>f</sup></b> |
| Employment status <sup>a</sup>              |                         |                                |                         |                                |
| Formal employment                           | Reference               |                                | Reference               |                                |
| Informal employment                         | 1.04                    | (0.66-1.63)                    | 1.29                    | (0.68-2.44)                    |
| Retired/pensioner                           | 0.87                    | (0.57-1.35)                    | 1.48                    | (0.78-2.79)                    |
| Unemployed                                  | 1.12                    | (0.77-1.65)                    | 0.75                    | (0.40-1.44)                    |
| Marital status <sup>b</sup>                 |                         |                                |                         |                                |
| Married/common law marriage                 | Reference               |                                | Reference               |                                |
| Single                                      | 1.06                    | (0.76-1.47)                    | 0.87                    | (0.57-1.32)                    |
| Widowed                                     | 0.72                    | (0.41-1.25)                    | 0.57                    | (0.24-1.37)                    |
| Province                                    |                         |                                |                         |                                |
| Panama and Colon                            | Reference               |                                | Reference               |                                |
| Veraguas and Cocle                          | 0.87                    | (0.58-1.32)                    | 0.86                    | (0.50-1.47)                    |
| Herrera and Los Santos                      | 0.62                    | (0.36-1.07)                    | 0.71                    | (0.33-1.52)                    |
| Other provinces                             | 0.82                    | (0.48-1.41)                    | 1.06                    | (0.48-2.33)                    |
| Anatomic location by endoscopy <sup>c</sup> |                         |                                |                         |                                |
| Non-cardia                                  | Reference               |                                | Reference               |                                |
| Cardia                                      | 1.30                    | (0.78-2.19)                    | 0.94                    | (0.42-2.13)                    |
| Overlapping                                 | 1.34                    | (0.99-1.83)                    | <b>1.50<sup>f</sup></b> | <b>(1.02-2.22)<sup>f</sup></b> |
| Histologic type <sup>d</sup>                |                         |                                |                         |                                |
| Intestinal type                             | Reference               |                                | Reference               |                                |
| Diffuse type                                | <b>1.64<sup>f</sup></b> | <b>(1.13-2.40)<sup>f</sup></b> | 0.79                    | (0.43-1.47)                    |
| Mixed type                                  | <b>2.12<sup>f</sup></b> | <b>(1.31-3.44)<sup>f</sup></b> | 1.57                    | (0.80-3.07)                    |
| Tumor grade <sup>e</sup>                    |                         |                                |                         |                                |
| Well/moderately differentiated              | Reference               |                                | Reference               |                                |
| Poorly differentiated                       | <b>1.91<sup>f</sup></b> | <b>(1.38-2.65)<sup>f</sup></b> | <b>2.27<sup>f</sup></b> | <b>(1.22-4.22)<sup>f</sup></b> |
| Clinical stage                              |                         |                                |                         |                                |
| I-III                                       | Reference               |                                | Reference               |                                |
| IV                                          | <b>4.37<sup>f</sup></b> | <b>(3.02-6.33)<sup>f</sup></b> | <b>5.54<sup>f</sup></b> | <b>(3.38-9.08)<sup>f</sup></b> |

<sup>a</sup>Employment status: 1 missing; <sup>b</sup>Marital status: 1 missing; <sup>c</sup>Anatomic location: 11 missing; <sup>d</sup>Histologic type: 83 missing;

<sup>e</sup>Tumor grade: 9 missing; <sup>f</sup>p < 0.05.

### 3.2. Costs

A total of 524 patients (85.8%) received any type of care, for an overall total cost of 2,231,728 USD and an OMC per patient of 4,259 USD (95% CI: 3,915-4,603), as shown in Table 3. When stratifying patients by type of care, 73.5% were admitted to the NOI, 66.4% were given chemotherapy, 30.3% underwent a surgical procedure, and 18% received radiotherapy. The highest expenses were attributed to hospital admissions (1,156,460 USD). Chemotherapy accounted for the second highest total cost (652,370 USD), being three times greater than the total cost of radiotherapy (206,872 USD). However, when comparing mean costs, radiotherapy exceeded chemotherapy by 274 USD per patient. For surgical procedures the total cost was 216,026 USD, representing 9.7% of the overall cost.

**Table 3**

Direct cost estimates (total and means) according to type of care received in patients with gastric cancer at the NOI. 2012-2015.

| Type of care       | Patients receiving care (%) <sup>a</sup> | Total cost (USD)       | Mean cost per patient (USD) | 95% CI        |
|--------------------|------------------------------------------|------------------------|-----------------------------|---------------|
| Overall            | 524/611 (85.8)                           | 2,231,728              | 4,259                       | (3,915-4,603) |
| Hospital admission | 449/611 (73.5)                           | 1,156,460 <sup>b</sup> | 2,576 <sup>b</sup>          | (2,359-2,792) |
| Radiotherapy       | 110/611 (18.0)                           | 206,872                | 1,881                       | (1,729-2,033) |
| Chemotherapy       | 406/611 (66.4)                           | 652,370                | 1,607                       | (1,363-1,851) |
| Surgery            | 185/611 (30.3)                           | 216,026                | 1,168                       | (1,077-1,259) |

USD: US dollars; CI: Confidence intervals; <sup>a</sup>Since a single patient could receive different types of care, calculations were made separately for each category and percentages do not add up to 100%; <sup>b</sup>Calculated for occupied bed-days.

Table 4 presents the costs stratified by sex, social security status and disease stage groups, according to type of care received. Women had an OMC per patient of 4,258 USD, while for men it was 4,260 USD. For those with social security, the OMC per patient was 4,414 USD, whereas for those without social security, it was 3,657 USD. Patients with stage I-III disease presented an OMC of 5,174 USD, compared to 4,930 USD for those with stage IV disease (see Supplementary Figure 2 for detailed cost distributions). No statistically significant differences were observed in the OMC between groups.

**Table 4**

Direct cost estimates by sex, social security status and clinical stage of patients with gastric cancer according to type of care received at the NOI. 2012-2015.

| Type of care | Male patients<br>n=380         |                    |               | Female patients<br>n=231       |                    |               | Bootstrap p-value |
|--------------|--------------------------------|--------------------|---------------|--------------------------------|--------------------|---------------|-------------------|
|              | Received care (%) <sup>a</sup> | Mean cost (USD)    | 95% CI        | Received care (%) <sup>a</sup> | Mean cost (USD)    | 95% CI        |                   |
| O            | 324/380 (85.3)                 | 4,260              | (3,789-4,731) | 200/231 (86.6)                 | 4,258              | (3,774-4,741) | 0.994             |
| HA           | 281/380 (73.9)                 | 2,487 <sup>b</sup> | (2,219-2,755) | 168/231 (72.7)                 | 2,724 <sup>b</sup> | (2,340-3,108) |                   |
| CT           | 247/380 (65.0)                 | 1,694              | (1,257-2,131) | 159/231 (68.8)                 | 1,472              | (1,204-1,740) |                   |

|                     |                                                |                        |               |                                                   |                        |               |                          |
|---------------------|------------------------------------------------|------------------------|---------------|---------------------------------------------------|------------------------|---------------|--------------------------|
| RT                  | 69/380<br>(18.2)                               | 1,915                  | (1,695-2,135) | 41/231<br>(17.7)                                  | 1,823                  | (1,582-2,064) |                          |
| SR                  | 117/380<br>(30.8)                              | 1,118                  | (1,028-1,209) | 68/231<br>(29.4)                                  | 1,253                  | (1,074-1,432) |                          |
|                     | <b>Patients with social security<br/>n=473</b> |                        |               | <b>Patients without social security<br/>n=138</b> |                        |               |                          |
| <b>Type of care</b> | <b>Received care (%)<sup>a</sup></b>           | <b>Mean cost (USD)</b> | <b>95% CI</b> | <b>Received care (%)<sup>a</sup></b>              | <b>Mean cost (USD)</b> | <b>95% CI</b> | <b>Bootstrap p-value</b> |
| O                   | 417/473<br>(88.2)                              | 4,414                  | (4,014-4,813) | 107/138<br>(77.5)                                 | 3,657                  | (3,014-4,299) | 0.059                    |
| HA                  | 357/473<br>(75.5)                              | 2,562 <sup>b</sup>     | (2,318-2,806) | 92/138<br>(66.7)                                  | 2,628 <sup>b</sup>     | (2,111-3,145) |                          |
| CT                  | 326/473<br>(68.9)                              | 1,722                  | (1,376-2,069) | 80/138<br>(58.0)                                  | 1,136                  | (833-1,439)   |                          |
| RT                  | 93/473<br>(19.7)                               | 1,848                  | (1,665-2,031) | 17/138<br>(12.3)                                  | 2,060                  | (1,702-2,417) |                          |
| SR                  | 160/473<br>(33.8)                              | 1,202                  | (1,103-1,302) | 25/138<br>(18.1)                                  | 945                    | (871-1,019)   |                          |
|                     | <b>Stage I - III<br/>n=111</b>                 |                        |               | <b>Stage IV<br/>n=212</b>                         |                        |               |                          |
| <b>Type of care</b> | <b>Received care (%)<sup>a</sup></b>           | <b>Mean cost (USD)</b> | <b>95% CI</b> | <b>Received care (%)<sup>a</sup></b>              | <b>Mean cost (USD)</b> | <b>95% CI</b> | <b>Bootstrap p-value</b> |
| O                   | 108/111<br>(97.3)                              | 5,174                  | (4,516-5,832) | 201/212<br>(94.8)                                 | 4,930                  | (4,330-5,529) | 0.598                    |
| HA                  | 86/111<br>(77.5)                               | 2,994 <sup>b</sup>     | (2,353-3,635) | 179/212<br>(84.4)                                 | 2,853 <sup>b</sup>     | (2,484-3,221) |                          |
| CT                  | 85/111<br>(76.6)                               | 890                    | (683-1,097)   | 173/212<br>(81.6)                                 | 2,055                  | (1,579-2,530) |                          |
| RT                  | 60/111<br>(54.1)                               | 2,341                  | (2,243-2,440) | 27/212<br>(12.7)                                  | 1,297                  | (897-1,697)   |                          |
| SR                  | 85/111<br>(76.6)                               | 1,003                  | (930-1,075)   | 69/212<br>(32.5)                                  | 1,302                  | (1,127-1,477) |                          |

O: Overall; HA: Hospital admission; CT: Chemotherapy; RT: Radiotherapy; SR: Surgery; USD: US dollars; CI: Confidence intervals; <sup>a</sup>Since a single patient could receive different types of care, calculations were made separately for each category and percentages do not add up to 100%. <sup>b</sup>Calculated for occupied bed-days.

#### 4. Discussion

Our findings suggest that lack of social security, a poorly differentiated tumor, clinical stage IV and overlapping anatomic location were associated with increased all-cause mortality, independently of other socioeconomic and clinical variables. Furthermore, the overall one-year survival rate in our study was 41% and the estimated OMC of GC care per patient was 4,259 USD.

Socioeconomic factors such as insurance coverage and geographic location have been implicated in mortality outcomes and healthcare disparities.<sup>16-20</sup> Likewise, cultural differences have been documented as strong factors influencing medical care in many Latin American countries, especially in cancer.<sup>19 21</sup> According to national estimates, 80% of the Panamanian population has social security, of which 57% are active workers and 43% are beneficiaries.<sup>22</sup> In our results, patients without social

1  
2  
3 security had a two-fold higher risk of dying in comparison to those with social  
4 security. Similarly, in Colombia, patients with a more affluent socioeconomic status  
5 and a private health insurance regimen had a significantly higher GC survival.<sup>23</sup> The  
6 lack of social security has been related to late stage diagnosis,<sup>24</sup> and health insurance  
7 regimes facilitate greater access to physician care and increase medical service  
8 utilization, thus granting patients longer survival times.<sup>25</sup> In addition, lacking social  
9 security has been documented as a barrier in access for other cancers in Panama.<sup>4 5</sup>  
10 Likewise, a previous study conducted in Sweden has shown the importance of  
11 socioeconomic factors in GC mortality, where a higher educational level was  
12 associated with a lower mortality and patients living in rural areas had a higher risk of  
13 dying due to this type of cancer.<sup>26</sup> Of note, one third of our patients were unemployed,  
14 most of them being older than 65 years and beneficiaries from the social security  
15 system. The higher proportion of unemployed patients observed, compared to  
16 another study of GC in the region,<sup>27</sup> highlights the importance of social security as an  
17 aid in front of the complex socioeconomic situation of this population, heavily  
18 dependent on having a formally-employed relative in order to have better access to  
19 GC-related services. Taken together, these findings emphasize the importance of  
20 socioeconomic determinants in the disease outcomes of GC.  
21  
22  
23  
24  
25  
26

27  
28 Geographic disparities in Panama are a well-known problem, as for some  
29 indigenous and other remote regions, human resources and equipment available for  
30 diagnosis and treatment are limited.<sup>28</sup> Together, Panama and Colon comprise more  
31 than half of the national population and have higher access to healthcare services, one  
32 of them being host to the NOI.<sup>29</sup> Herrera was the province with most patients treated  
33 at the NOI per 100,000 population, which could be explained by the fact of having the  
34 country's highest number of health professionals per capita,<sup>29</sup> giving the patients  
35 higher chances of being diagnosed and referred to the NOI. Nevertheless, with half of  
36 the amount of health professionals per capita, Veraguas province was second in  
37 patients treated at the NOI per 100,000 population, and according to national  
38 estimates it ranks first in incidence and second in mortality in the country.<sup>30</sup>  
39 Interestingly, the provinces of Veraguas and Coclé, despite having the highest  
40 proportion of their patients with stage IV disease (74.1% and 69.6% respectively),  
41 accounted for two of the smallest proportions of their residents being diagnosed in  
42 institutions inside their territory (10.9% and 7.4% respectively). Although geography  
43 was not associated with higher all-cause mortality in our study, these findings  
44 underscore the need of further research on GC to determine geographical disparities  
45 in depth, as well as lifestyle, environmental, genetic factors, and the interaction among  
46 them.<sup>31-34</sup>  
47  
48  
49  
50  
51  
52

53 In agreement with other studies,<sup>10 35</sup> the male to female ratio was 1.64 and GC was  
54 most common in the elderly group.<sup>10 36</sup> Nevertheless, we found a high proportion of  
55 EOGC (14.7%) compared to those reported in most countries of the region,<sup>36</sup> only  
56 surpassed by Guatemala in Central-America with national estimates of 16.5%,<sup>10</sup> a  
57  
58  
59  
60

1  
2  
3 comparison worth noting even if our results are based on a single institution.  
4 Likewise, in a hospital-based study conducted in Mexico, a similar proportion of EOGC  
5 was reported.<sup>37</sup> These discrepancies might mirror differences in underreporting, risk  
6 factors and information seeking, making it difficult to compare.  
7  
8

9  
10 Clinical stage was only reported in half of the patients, a five-fold lower rate than  
11 that reported by the SEER,<sup>7</sup> and twice as low as the one reported in a rural community  
12 in Chile.<sup>38</sup> Moreover, two thirds had stage IV disease, compared to 25% and 60%, as  
13 reported in other studies from developed and developing countries.<sup>38 39</sup> It is widely  
14 known that being initially diagnosed at an advanced clinical stage of the disease  
15 correlates with delayed diagnosis.<sup>40</sup> Given that up to 50% of GC patients have  
16 unspecific gastrointestinal symptoms,<sup>41</sup> and alarm symptoms are usually present at  
17 advanced stage in most cases,<sup>42 43</sup> early diagnosis is a challenge. Remarkably, 14.2% of  
18 the patients in our study were diagnosed and then lost to follow-up, compared to  
19 other studies that have shown higher compliance rates to appointments or  
20 treatment.<sup>44</sup> Also, socioeconomic disparities negatively influence access to endoscopic  
21 services causing delayed diagnoses,<sup>45 46</sup> access to further appointments, and  
22 inadequate adherence to treatment,<sup>47</sup> and might have hampered the successful  
23 staging and follow-up of patients.  
24  
25  
26  
27

28  
29 Non-cardia tumors were three times as frequent as cardia tumors, and intestinal  
30 type tumors were predominant versus diffuse type tumors, a consistent finding in the  
31 region.<sup>10 36</sup> However, poorly differentiated tumors were twice as common in  
32 comparison to the well/moderately differentiated group. Despite the histological  
33 paradigm stating that intestinal type tumors are well differentiated and that diffuse  
34 type tumors are poorly differentiated,<sup>48 49</sup> other studies have reported similar  
35 results.<sup>50 51</sup> Yet, a possible explanation for this discordance is the high under-reporting  
36 of the histological type variable versus the almost complete reporting of the tumor  
37 grade variable.  
38  
39

40  
41 The one year survival rate was 41%, higher than those from other studies of the  
42 region (32%) but lower in comparison to developed countries (57%).<sup>7 23</sup> Other studies  
43 have shown that unfavorable clinical and histological features (advanced clinical  
44 stage, diffuse type, overlapping and poorly differentiated tumors) are poor prognostic  
45 factors for GC survival.<sup>38 52</sup> Nevertheless, our survival estimates should be interpreted  
46 with caution, given that our study only included patients attending the NOI. National  
47 studies are needed to determine the true GC rates of the whole Panamanian  
48 population.  
49  
50

51  
52 Published data regarding costs of cancer care are limited in Latin-America. A  
53 recent study conducted in Chile, evaluating direct and indirect costs of cancer  
54 (expressed as 2012 USD), reported that GC accounted for the highest direct costs  
55 among all cancers.<sup>16</sup> In a report published by the Panamanian Ministry of Health in  
56 2010, GC was responsible for the fourth highest cost among all cancers in Panama.<sup>28</sup> A  
57  
58  
59  
60

1  
2  
3 similar finding was seen in a population-based study conducted in the United States,  
4 in which costs of care for 18 different tumor sites were calculated using SEER and  
5 Medicare claims data from 1999 to 2003 (expressed as 2004 USD).<sup>53</sup>  
6  
7

8 The OMC of care per patient in our study was 4,259 USD, compared to the Chilean  
9 study that reported an OMC per patient of 3,706,145 Chilean pesos (CLP)  
10 (approximately 7,642 USD) for public health insurance regimes, and 3,102,978 CLP  
11 (approximately 6,398 USD) for private health insurance regimes.<sup>16</sup> The study  
12 conducted in the United States reported these costs by phases of care, reaching mean  
13 net costs as high as 46,501 USD in the initial phase (first 12 months after diagnosis),  
14 and 54,947 USD during the last year of life. On the other hand, in a 2015 cross-  
15 sectional study from Iran, the mean cost per patient was 2,596 USD.<sup>54</sup> Differences in  
16 OMC between studies might be explained by distinct definitions of types of care, since  
17 costs for a different range of services were included in each report.  
18  
19  
20

21 Hospital admission accounted for the highest proportion of the total costs of care  
22 (51.8%), as reported previously.<sup>53</sup> Given the introduction of newer, costly  
23 chemotherapeutic agents in the latest years, and that a majority of patients in our  
24 study was reported with stage IV disease, one would expect chemotherapy to be  
25 accountable for the highest proportion of costs.<sup>55</sup> Nevertheless, underestimation of  
26 chemotherapy costs is likely, since we only included costs for medications and not  
27 chemotherapy sessions. Supporting this, in a previous local report, chemotherapy  
28 represented the highest institutional expenditure at the NOI in 2009.<sup>28</sup>  
29  
30  
31

32 Women tend to have higher health resource utilization and expenditures than  
33 men.<sup>56</sup> This pattern, however, has not been reported for most tumor sites,<sup>53</sup> and was  
34 neither seen in our study. When assessing costs by tumor stage, some cancers may  
35 reflect higher costs with more advanced stages, but for cancers that are usually  
36 diagnosed in an advanced stage and with relatively short survival times as GC,  
37 differences in costs by stage are slighter,<sup>53</sup> as observed in our results. Despite not  
38 finding statistically significant differences, the greatest gap in OMC was observed  
39 when comparing social security status groups. In fact, in our study, patients without  
40 social security accounted for only 20.4% of the patients receiving care, versus 79.6%  
41 patients who had social security. This highlights the possibility that lack of social  
42 security and thus high out-of-pocket expenses is an important barrier in seeking care,  
43 resulting in lower healthcare utilization and therefore reflecting lower institutional  
44 expenditure in GC patients without social security.  
45  
46  
47  
48  
49

50 To the best of our knowledge, this is the first study assessing epidemiology of GC  
51 and costs related to its care in Panama. A key strength of this study was that mortality  
52 data was ascertained with the NMR. The use of actual chemotherapeutic doses  
53 administered allowed a more accurate calculation of medication costs, and using the  
54 bootstrap method for mean cost comparison purposes provided us with a more  
55  
56  
57  
58  
59  
60



flexible tool to compare arithmetic mean costs, avoiding the assumptions and limitations inherent to other methods.<sup>57-59</sup>

Several limitations deserve mentioning. This study encompassed patients from a single cancer institution and our results cannot be extrapolated to the whole population. However, the NOI is the biggest and main cancer referral public hospital in the country, where the majority of the cancer patients from all over the country are treated.<sup>4 5</sup> There was a considerable amount of underreporting and missing variables (e.g., *Helicobacter pylori* infection status, genetic factors), which have demonstrated to have a central role in disease outcomes. Lastly, incomplete data regarding chemotherapy protocol sessions, resource utilization and outpatient expenses, most likely led to underestimation of costs.

In conclusion, socioeconomic disparities strongly influence GC outcomes and healthcare utilization. Our results suggest the need for an in-depth characterization of the barriers in access to GC related services, particularly for diagnosis and to address geographical disparities, such as the one observed in the Veraguas province.

Given that efforts directed towards making earlier diagnoses have proven to reduce the gap in cancer survival between different socioeconomic groups,<sup>60</sup> health policies should move towards a more inclusive system for GC patients from lower socioeconomic strata. Further, building capacity training, boosting the investment in medical equipment and improving databases to have more accurate estimates of GC data in our population are strongly encouraged, including social security status in future studies evaluating cancer mortality in Panama.

#### Acknowledgements

The authors would like to thank Fulvia Ibarra from the National Institute of Census and Statistics, Cecilio Niño from the Gorgas Memorial Institute for Health Studies, José Jiménez, head of the Department of Clinical Files at the NOI and Erick Trejos, head of the Department of Finance at the NOI.

#### Footnotes

Contributors: FC and DS curated, analyzed and interpreted the data, did the research, critically revised the draft for important intellectual content and wrote the draft of the work. MT interpreted the data, did the research and critically revised the draft for important intellectual content. IMV analyzed and interpreted the data, did the research and critically revised the draft for important intellectual content and wrote the draft of the work. MTC, VH and MC interpreted the data, critically revised the draft for important intellectual content. BG and JM designed and supervised the work and critically revised the draft for important intellectual content. Final approval of the version to be published was given by FC, DS, MT, IMV, MTC, VH, BG, MC and JM. All the authors agree to be accountable for all aspects of the work in ensuring that questions

related to the accuracy or integrity of any part of the work are appropriately investigated and resolved.

Funding: This research received no specific grant from any funding agency in the public, commercial or not-for-profit sectors.

Competing interests: FC, DS, MT, IMV, VH, BG, MC, JM have completed the ICMJE uniform disclosure form at [www.icmje.org/coi\\_disclosure.pdf](http://www.icmje.org/coi_disclosure.pdf) and declare no conflicts of interest. MTC reports medical managing at Sanofi Pasteur, outside the submitted work.

Data sharing statement: No additional data are available.

## References

1. Bonequi P, Meneses-González F, Correa P, et al. Risk factors for gastric cancer in Latin-America: a meta-analysis. *Cancer causes & control : CCC* 2013;24(2):217-31. doi: 10.1007/s10552-012-0110-z
2. Registro Nacional de Cáncer [National Cancer Registry]. El cáncer en Panamá, año 2011 [Cancer in Panama, year 2011] 2011 [Available from: [http://190.34.154.93/rncp/sites/all/files/rncp\\_2011\\_monografiadocx.pdf](http://190.34.154.93/rncp/sites/all/files/rncp_2011_monografiadocx.pdf) accessed 02/10/2017.
3. Mahar AL, El-Sedfy A, Brar SS, et al. Are We Lacking Economic Evaluations in Gastric Cancer Treatment? *Pharmacoeconomics* 2015;33(2):83-87. doi: 10.1007/s40273-014-0215-1
4. Roquebert M, Palacios G, Ramos Y, et al. Barreras y oportunidades en la atención de salud en mujeres con cáncer de mama de la ciudad de Panamá. Año 2012. 2012 [Available from: <http://ww5.komen.org/uploadedFiles/Content/AboutUs/GlobalReach/Panama%20Health%20System%20Report.pdf> accessed 03/13/2017.
5. Roquebert M, Ramos Y, Palacios G, et al. Estudio cualitativo, descriptivo para investigar barreras y oportunidades en la atención de salud de cáncer de mama en mujeres de las provincias de Chiriquí, Herrera, Los Santos, Veraguas y en mujeres indígenas de Panamá. Año 2014. 2014 [Available from: [http://ww5.komen.org/uploadedFiles/\\_Komen/Content/Grants\\_Central/International\\_Grants/Grantee\\_Resources/HSR\\_Panama\\_2014.pdf](http://ww5.komen.org/uploadedFiles/_Komen/Content/Grants_Central/International_Grants/Grantee_Resources/HSR_Panama_2014.pdf) accessed 03/15/2017.
6. Milne AN, Offerhaus GJ. Early-onset gastric cancer: Learning lessons from the young. *World J Gastrointest Oncol* 2010;2(2):59-64. doi: 10.4251/wjgo.v2.i2.59
7. National Cancer Institute. SEER Stat Fact Sheets: Stomach Cancer 2015 [Available from: <http://seer.cancer.gov/statfacts/html/stomach.html>.
8. Social Security Administration. Social Security Programs Throughout the World: The Americas 2015 [Available from: <https://www.ssa.gov/policy/docs/progdesc/ssptw/2014-2015/americas/panama.html> accessed 01/31/17.

- 1  
2  
3 9. Instituto Nacional de Estadística y Censo. Estimación del Producto Interno Bruto  
4 Provincial, según categoría de actividad económica, a precios de 1996: Años  
5 2003-05. 2006 [Available from:  
6 [https://www.contraloria.gob.pa/inec/publicaciones/Publicaciones.aspx?ID\\_SU](https://www.contraloria.gob.pa/inec/publicaciones/Publicaciones.aspx?ID_SU)  
7 [BCATEGORIA=26&ID\\_PUBLICACION=63&ID\\_IDIOMA=1&ID\\_CATEGORIA=4](https://www.contraloria.gob.pa/inec/publicaciones/Publicaciones.aspx?ID_SU)  
8 accessed 02/10/2017.
- 9  
10 10. Corral JE, Delgado Hurtado JJ, Domínguez RL, et al. The descriptive epidemiology  
11 of gastric cancer in Central America and comparison with United States  
12 Hispanic populations. *Journal of gastrointestinal cancer* 2015;46(1):21-28. doi:  
13 10.1007/s12029-014-9672-1
- 14  
15 11. Lauren P. THE TWO HISTOLOGICAL MAIN TYPES OF GASTRIC CARCINOMA:  
16 DIFFUSE AND SO-CALLED INTESTINAL-TYPE CARCINOMA. AN ATTEMPT AT A  
17 HISTO-CLINICAL CLASSIFICATION. *Acta pathologica et microbiologica*  
18 *Scandinavica* 1965;64:31-49. [published Online First: 1965/01/01]
- 19  
20 12. Zheng H-c, Li X-h, Hara T, et al. Mixed-type gastric carcinomas exhibit more  
21 aggressive features and indicate the histogenesis of carcinomas. *Virchows*  
22 *Archiv* 2008;452(5):525-34. doi: 10.1007/s00428-007-0572-7
- 23  
24 13. Kim SH, Ha TK, Kwon SJ. Evaluation of the 7th AJCC TNM Staging System in Point  
25 of Lymph Node Classification. *Journal of Gastric Cancer* 2011;11(2):94-100. doi:  
26 10.5230/jgc.2011.11.2.94
- 27  
28 14. Instituto Nacional de Estadística y Censo. Panamá en cifras 2014 [Available from:  
29 [https://www.contraloria.gob.pa/inec/Publicaciones/Publicaciones.aspx?ID\\_S](https://www.contraloria.gob.pa/inec/Publicaciones/Publicaciones.aspx?ID_S)  
30 [UBCATEGORIA=45&ID\\_PUBLICACION=699&ID\\_IDIOMA=1&ID\\_CATEGORIA=1](https://www.contraloria.gob.pa/inec/Publicaciones/Publicaciones.aspx?ID_S)  
31 7 accessed 05/19/2016.
- 32  
33 15. Efron B, Tibshirani RJ. An Introduction to the Bootstrap (Chapman & Hall/CRC  
34 Monographs on Statistics & Applied Probability): Chapman and Hall/CRC 1994.
- 35  
36 16. Cid C, Herrera C, Rodriguez R, et al. [Assessing the economic impact of cancer in  
37 Chile: a direct and indirect cost measurement based on 2009 registries].  
38 *Medwave* 2016;16(7):e6509. doi: 10.5867/medwave.2016.07.6509 [published  
39 Online First: 2016/08/18]
- 40  
41 17. Pereira L, Zamudio R, Soares-Souza G, et al. Socioeconomic and Nutritional Factors  
42 Account for the Association of Gastric Cancer with Amerindian Ancestry in a  
43 Latin American Admixed Population. *PloS one* 2012;7(8):e41200. doi:  
44 10.1371/journal.pone.0041200
- 45  
46 18. Shavers VL, Brown ML. Racial and Ethnic Disparities in the Receipt of Cancer  
47 Treatment. *JNCI: Journal of the National Cancer Institute* 2002;94(5):334-57.  
48 doi: 10.1093/jnci/94.5.334
- 49  
50 19. Strasser-Weippl K, Chavarri-Guerra Y, Villarreal-Garza C, et al. Progress and  
51 remaining challenges for cancer control in Latin America and the Caribbean.  
52 *The Lancet Oncology* 2015;16(14):1405-38.
- 53  
54 20. Ward E, Jemal A, Cokkinides V, et al. Cancer Disparities by Race/Ethnicity and  
55 Socioeconomic Status. *CA: A Cancer Journal for Clinicians* 2004;54(2):78-93.  
56 doi: 10.3322/canjclin.54.2.78
- 57  
58 21. Kagawa-Singer M, Valdez Dadia A, Yu MC, et al. Cancer, Culture, and Health  
59 Disparities: Time to Chart a New Course? *CA: A Cancer Journal for Clinicians*  
60 2010;60(1):12-39. doi: 10.3322/caac.20051

22. Social Security Fund. Social Security Coverage in Panama Panama2010 [Available from: <http://www.css.gob.pa/seguridadsocial/cobertura.html> accessed 02/14/2017.
23. Bravo LE, Garcia LS, Collazos PA. Cancer survival in Cali, Colombia: A population-based study, 1995-2004. *Colombia medica* 2014;45(3):110-6.
24. Roetzheim RG, Pal N, Tennant C, et al. Effects of health insurance and race on early detection of cancer. *Journal of the National Cancer Institute* 1999;91(16):1409-15.
25. Kang S, Kwon YD, You CH, et al. The benefits of supplementary private health insurance for healthcare utilization and survival among stomach cancer patients. *The Tohoku journal of experimental medicine* 2009;217(3):243-50.
26. Ljung R, Drefahl S, Andersson G, et al. Socio-demographic and geographical factors in esophageal and gastric cancer mortality in Sweden. *PloS one* 2013;8(4):e62067. doi: 10.1371/journal.pone.0062067
27. de Boer AG, Bruinvels DJ, Tytgat KM, et al. Employment status and work-related problems of gastrointestinal cancer patients at diagnosis: a cross-sectional study. *BMJ open* 2011;1(2):e000190. doi: 10.1136/bmjopen-2011-000190
28. Ministerio de Salud de Panamá [Panamanian Ministry of Health]. Plan Nacional para la Prevención y Control del Cáncer [National Plan for Prevention and Control of Cancer] 2010 - 2015 2011 [Available from: [http://190.34.154.93/rncp/sites/all/files/pnpcc\\_0.pdf](http://190.34.154.93/rncp/sites/all/files/pnpcc_0.pdf) accessed 2/21/17.
29. National Institute of Statistics and Census. Panama in numbers: years 2010-2014 2014 [Available from: [https://www.contraloria.gob.pa/inec/Publicaciones/Publicaciones.aspx?ID\\_SUBCATEGORIA=45&ID\\_PUBLICACION=699&ID\\_IDIOMA=1&ID\\_CATEGORIA=17](https://www.contraloria.gob.pa/inec/Publicaciones/Publicaciones.aspx?ID_SUBCATEGORIA=45&ID_PUBLICACION=699&ID_IDIOMA=1&ID_CATEGORIA=17) accessed 05/19/2016.
30. Gorgas Memorial Institute for Health Studies. Geographic Information System of Cancer Mortality and Incidence in Panama Panama2000-2013 [Available from: <http://www.gorgas.gob.pa/SIGCANCER/Inicio.htm> accessed 02/14/2017.
31. Lee YY, Derakhshan MH. Environmental and lifestyle risk factors of gastric cancer. *Archives of Iranian medicine* 2013;16(6):358-65. doi: 013166/AIM.0010
32. McLean MH, El-Omar EM. Genetics of gastric cancer. *Nature reviews Gastroenterology & hepatology* 2014;11(11):664-74. doi: 10.1038/nrgastro.2014.143
33. Yamaoka Y, Kato M, Asaka M. Geographic differences in gastric cancer incidence can be explained by differences between *Helicobacter pylori* strains. *Internal medicine* 2008;47(12):1077-83.
34. Yuan W, Yang N, Li X. Advances in Understanding How Heavy Metal Pollution Triggers Gastric Cancer. *BioMed research international* 2016;2016:7825432. doi: 10.1155/2016/7825432
35. Roder DM. The epidemiology of gastric cancer. *Gastric cancer : official journal of the International Gastric Cancer Association and the Japanese Gastric Cancer Association* 2002;5 Suppl 1:5-11.
36. Sierra MS, Cueva P, Bravo LE, et al. Stomach cancer burden in Central and South America. *Cancer epidemiology* 2016;44 Suppl 1:S62-S73. doi: 10.1016/j.canep.2016.03.008

- 1  
2  
3 37. Ramos-De la Medina A, Salgado-Nesme N, Torres-Villalobos G, et al.  
4 Clinicopathologic characteristics of gastric cancer in a young patient  
5 population. *Journal of gastrointestinal surgery : official journal of the Society for*  
6 *Surgery of the Alimentary Tract* 2004;8(3):240-4. doi:  
7 10.1016/j.gassur.2003.12.009  
8  
9 38. Heise K, Bertran E, Andia ME, et al. Incidence and survival of stomach cancer in a  
10 high-risk population of Chile. *World journal of gastroenterology*  
11 2009;15(15):1854-62.  
12  
13 39. Hundahl SA, Phillips JL, Menck HR. The National Cancer Data Base Report on poor  
14 survival of U.S. gastric carcinoma patients treated with gastrectomy: Fifth  
15 Edition American Joint Committee on Cancer staging, proximal disease, and the  
16 "different disease" hypothesis. *Cancer* 2000;88(4):921-32.  
17  
18 40. Rossi S, Cinini C, Di Pietro C, et al. Diagnostic delay in breast cancer: correlation  
19 with disease stage and prognosis. *Tumori* 1990;76(6):559-62. [published  
20 Online First: 1990/12/31]  
21  
22 41. Dicken BJ, Bigam DL, Cass C, et al. Gastric adenocarcinoma: review and  
23 considerations for future directions. *Annals of surgery* 2005;241(1):27-39.  
24  
25 42. Breslin NP, Thomson AB, Bailey RJ, et al. Gastric cancer and other endoscopic  
26 diagnoses in patients with benign dyspepsia. *Gut* 2000;46(1):93-7.  
27  
28 43. Meineche-Schmidt V, Jorgensen T. 'Alarm symptoms' in patients with dyspepsia: a  
29 three-year prospective study from general practice. *Scandinavian journal of*  
30 *gastroenterology* 2002;37(9):999-1007.  
31  
32 44. Hallissey MT, Allum WH, Jewkes AJ, et al. Early detection of gastric cancer. *Bmj*  
33 1990;301(6751):513-5.  
34  
35 45. Kim NY, Oh JS, Choi Y, et al. Relationship between socioeconomic status and  
36 accessibility for endoscopic resection among gastric cancer patients: using  
37 National Health Insurance Cohort in Korea: poverty and endoscopic resection.  
38 *Gastric cancer : official journal of the International Gastric Cancer Association*  
39 *and the Japanese Gastric Cancer Association* 2017;20(1):61-69. doi:  
40 10.1007/s10120-016-0597-1  
41  
42 46. Lee HY, Park EC, Jun JK, et al. Trends in socioeconomic disparities in organized and  
43 opportunistic gastric cancer screening in Korea (2005-2009). *Cancer*  
44 *epidemiology, biomarkers & prevention : a publication of the American*  
45 *Association for Cancer Research, cosponsored by the American Society of*  
46 *Preventive Oncology* 2010;19(8):1919-26. doi: 10.1158/1055-9965.EPI-09-  
47 1308  
48  
49 47. Formenti SC, Meyerowitz BE, Ell K, et al. Inadequate adherence to radiotherapy in  
50 Latina immigrants with carcinoma of the cervix. Potential impact on disease  
51 free survival. *Cancer* 1995;75(5):1135-40.  
52  
53 48. Kelley JR, Duggan JM. Gastric cancer epidemiology and risk factors. *Journal of*  
54 *clinical epidemiology* 2003;56(1):1-9.  
55  
56 49. Shah MA, Khanin R, Tang L, et al. Molecular classification of gastric cancer: a new  
57 paradigm. *Clinical cancer research : an official journal of the American*  
58 *Association for Cancer Research* 2011;17(9):2693-701. doi: 10.1158/1078-  
59 0432.CCR-10-2203  
60

- 1  
2  
3  
4  
5  
6  
7  
8  
9  
10  
11  
12  
13  
14  
15  
16  
17  
18  
19  
20  
21  
22  
23  
24  
25  
26  
27  
28  
29  
30  
31  
32  
33  
34  
35  
36  
37  
38  
39  
40  
41  
42  
43  
44  
45  
46  
47  
48  
49  
50  
51  
52  
53  
54  
55  
56  
57  
58  
59  
60
50. Shibata A, Longacre TA, Puligandla B, et al. Histological classification of gastric adenocarcinoma for epidemiological research: concordance between pathologists. *Cancer epidemiology, biomarkers & prevention : a publication of the American Association for Cancer Research, cosponsored by the American Society of Preventive Oncology* 2001;10(1):75-8.
  51. Yuasa Y. Control of gut differentiation and intestinal-type gastric carcinogenesis. *Nature reviews Cancer* 2003;3(8):592-600. doi: 10.1038/nrc1141
  52. Yang D, Hendifar A, Lenz C, et al. Survival of metastatic gastric cancer: Significance of age, sex and race/ethnicity. *Journal of gastrointestinal oncology* 2011;2(2):77-84. doi: 10.3978/j.issn.2078-6891.2010.025
  53. Yabroff KR, Lamont EB, Mariotto A, et al. Cost of care for elderly cancer patients in the United States. *Journal of the National Cancer Institute* 2008;100(9):630-41. doi: 10.1093/jnci/djn103 [published Online First: 2008/05/01]
  54. Izadi A, Sirizi MJ, Esmaeelpour S, et al. Evaluating Direct Costs of Gastric Cancer Treatment in Iran - Case Study in Kerman City in 2015. *Asian Pacific journal of cancer prevention : APJCP* 2016;17(6):3007-13. [published Online First: 2016/07/01]
  55. Gómez B, Gordón C, Herrera V, et al. Gasto, Acceso y Disponibilidad de los Medicamentos en Panamá, 2007-2012: documento diagnóstico [Expenditure, access and availability of medications in Panama, 2007-2012: diagnostic report]. 2014 [Available from: [http://siproy.mef.gob.pa/tab/15817\\_2010\\_24212\\_InformeMedicamentos.pdf](http://siproy.mef.gob.pa/tab/15817_2010_24212_InformeMedicamentos.pdf) accessed 02/10/2017.
  56. Owens GM. Gender differences in health care expenditures, resource utilization, and quality of care. *Journal of managed care pharmacy : JMCP* 2008;14(3 Suppl):2-6. doi: 10.18553/jmcp.2008.14.S6-A.2 [published Online First: 2008/05/24]
  57. Barber JA, Thompson SG. Analysis of cost data in randomized trials: an application of the non-parametric bootstrap. *Statistics in medicine* 2000;19(23):3219-36. [published Online First: 2000/12/13]
  58. Mani K, Bjorck M, Lundkvist J, et al. Similar cost for elective open and endovascular AAA repair in a population-based setting. *Journal of endovascular therapy : an official journal of the International Society of Endovascular Specialists* 2008;15(1):1-11. doi: 10.1583/07-2258.1 [published Online First: 2008/02/08]
  59. Mani K, Lundkvist J, Holmberg L, et al. Challenges in analysis and interpretation of cost data in vascular surgery. *Journal of vascular surgery* 2010;51(1):148-54. doi: 10.1016/j.jvs.2009.08.042 [published Online First: 2009/11/06]
  60. Li R, Daniel R, Rachet B. How much do tumor stage and treatment explain socioeconomic inequalities in breast cancer survival? Applying causal mediation analysis to population-based data. *European journal of epidemiology* 2016;31(6):603-11. doi: 10.1007/s10654-016-0155-5

1  
2  
3  
4  
5  
6  
7  
8  
9  
10  
11  
12  
13  
14  
15  
16  
17  
18  
19  
20  
21  
22  
23  
24  
25  
26  
27  
28  
29  
30  
31  
32  
33  
34  
35  
36  
37  
38  
39  
40  
41  
42  
43  
44  
45  
46  
47  
48  
49  
50  
51  
52  
53  
54  
55  
56  
57  
58  
59  
60

For peer review only

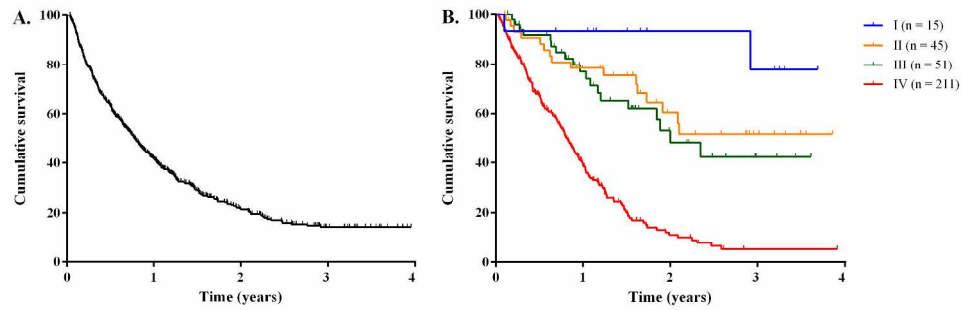

**Figure 1.** Kaplan-Meier plots for overall survival (A) and stage specific survival (B) for patients with gastric cancer treated at the NOI, 2012-2015.

270x95mm (300 x 300 DPI)



Supplementary Figure 1. Schematic diagram showing sample selection.

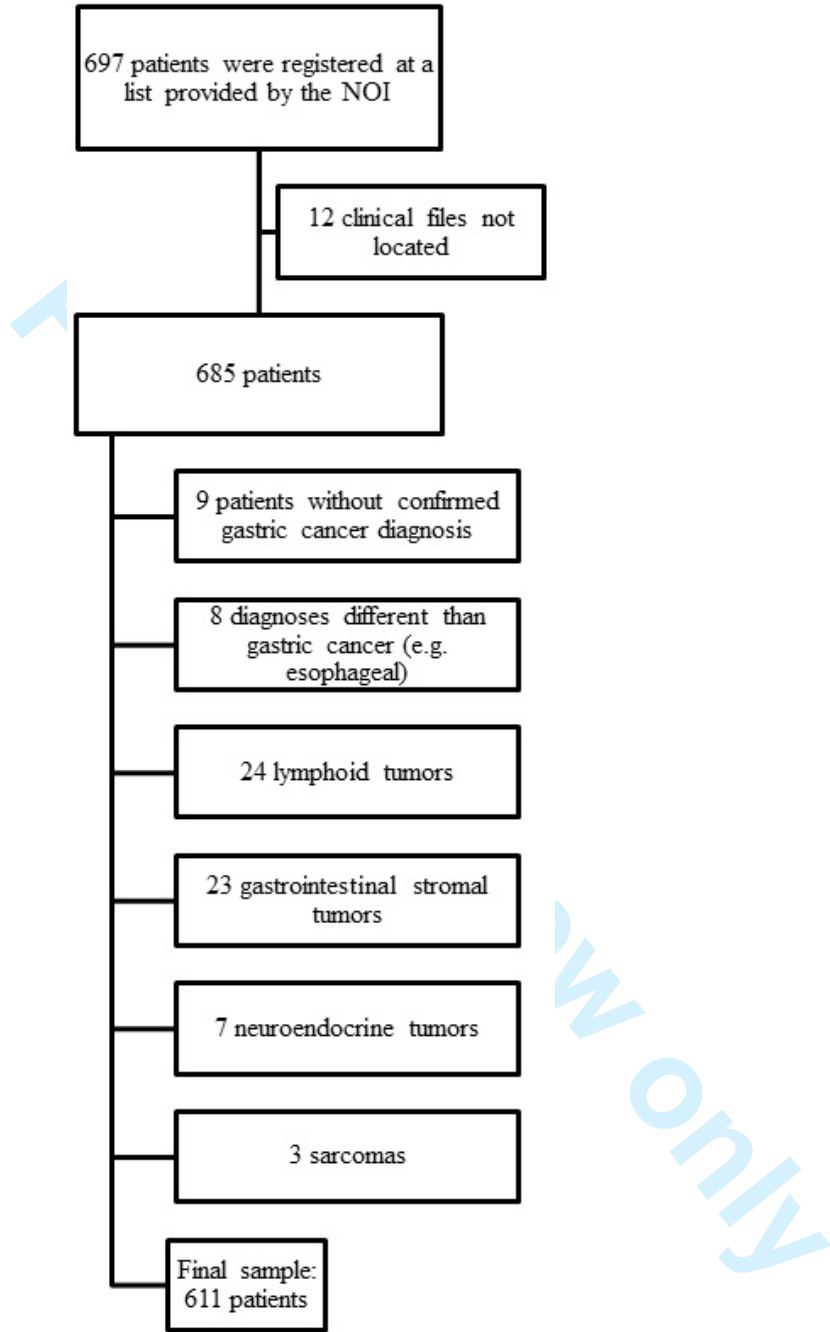

1  
2  
3  
4  
5  
6  
7  
8  
9  
10  
11  
12  
13  
14  
15  
16  
17  
18  
19  
20  
21  
22  
23  
24  
25  
26  
27  
28  
29  
30  
31  
32  
33  
34  
35  
36  
37  
38  
39  
40  
41  
42  
43  
44  
45  
46  
47  
48  
49  
50  
51  
52  
53  
54  
55  
56  
57  
58  
59  
60

**Supplementary Figure 2.** Frequency distribution of costs of care according to socioeconomic and clinical variables.

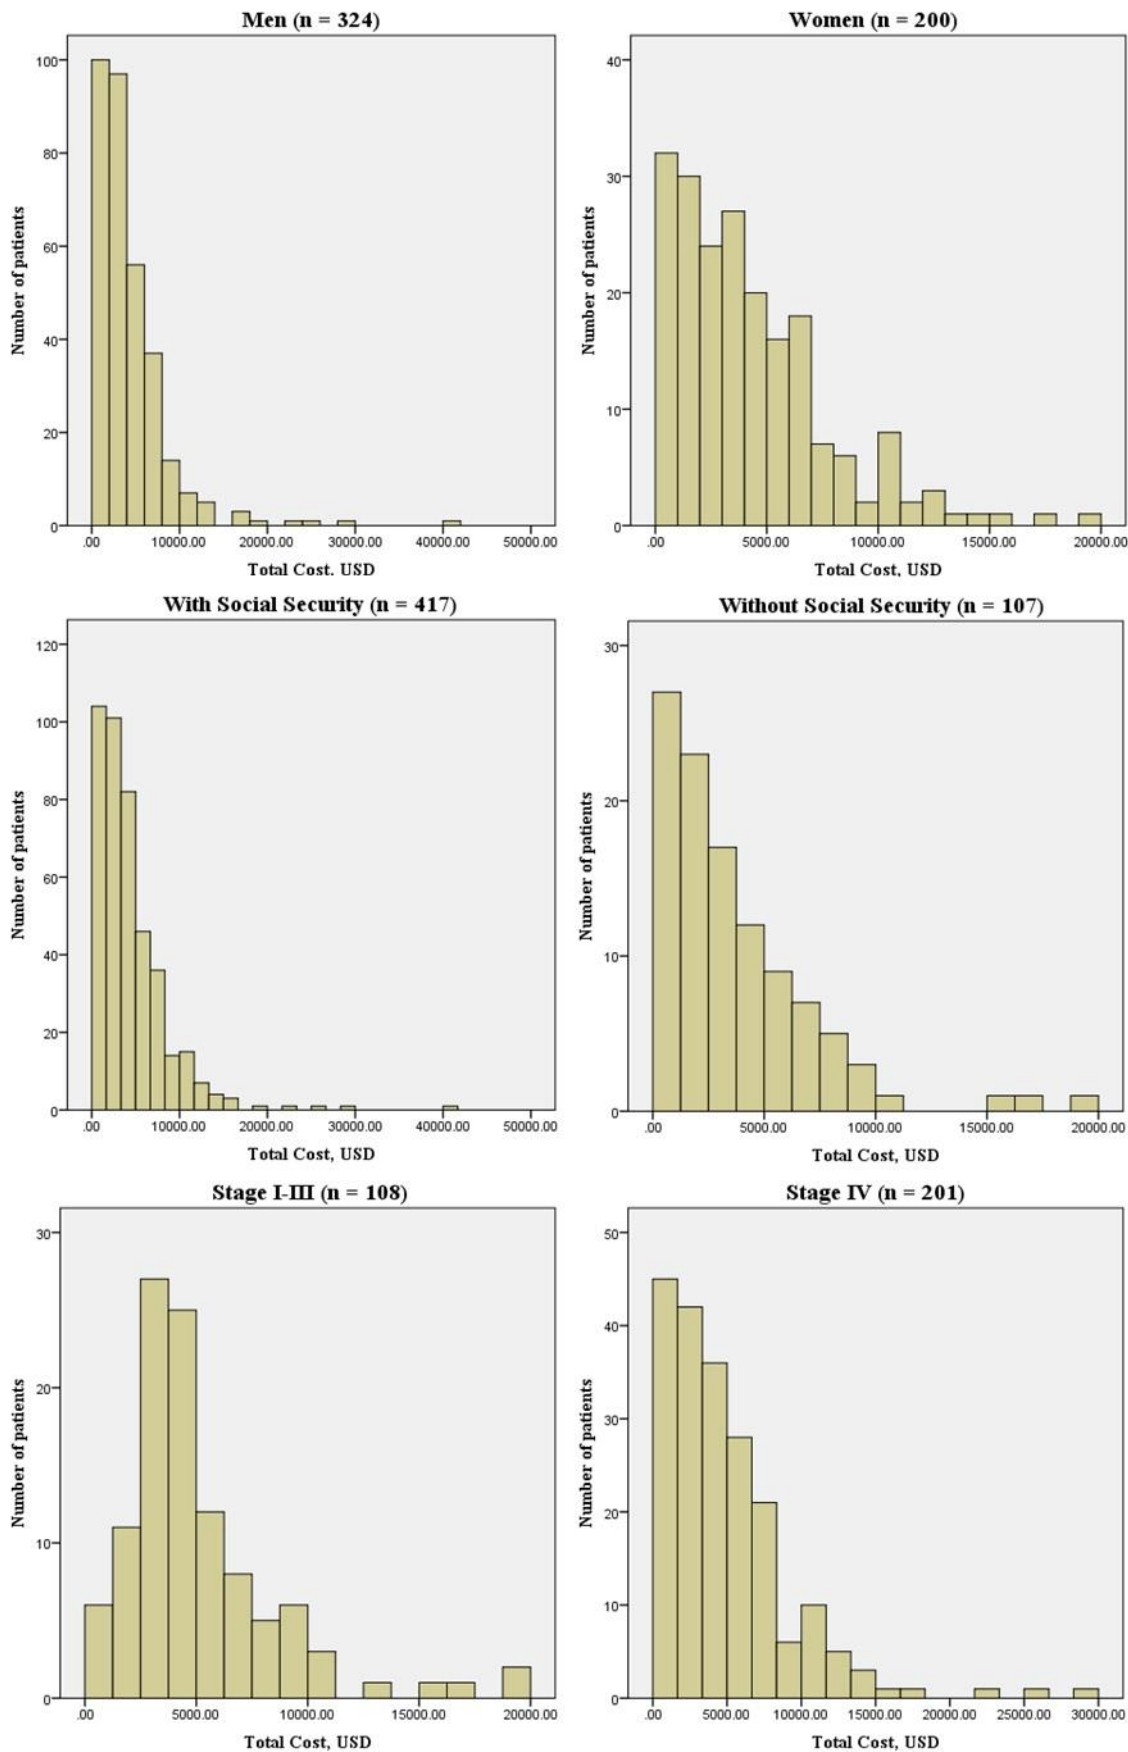

STROBE 2007 (v4) Statement—Checklist of items that should be included in reports of cross-sectional studies

| Section/Topic             | Item # | Recommendation                                                                                                                                                                       | Reported on page # |
|---------------------------|--------|--------------------------------------------------------------------------------------------------------------------------------------------------------------------------------------|--------------------|
| Title and abstract        | 1      | (a) Indicate the study’s design with a commonly used term in the title or the abstract                                                                                               | 1-2                |
|                           |        | (b) Provide in the abstract an informative and balanced summary of what was done and what was found                                                                                  | 2                  |
| <b>Introduction</b>       |        |                                                                                                                                                                                      |                    |
| Background/rationale      | 2      | Explain the scientific background and rationale for the investigation being reported                                                                                                 | 4                  |
| Objectives                | 3      | State specific objectives, including any prespecified hypotheses                                                                                                                     | 4                  |
| <b>Methods</b>            |        |                                                                                                                                                                                      |                    |
| Study design              | 4      | Present key elements of study design early in the paper                                                                                                                              | 4                  |
| Setting                   | 5      | Describe the setting, locations, and relevant dates, including periods of recruitment, exposure, follow-up, and data collection                                                      | 4                  |
| Participants              | 6      | (a) Give the eligibility criteria, and the sources and methods of selection of participants                                                                                          | 4                  |
| Variables                 | 7      | Clearly define all outcomes, exposures, predictors, potential confounders, and effect modifiers. Give diagnostic criteria, if applicable                                             | 5                  |
| Data sources/ measurement | 8*     | For each variable of interest, give sources of data and details of methods of assessment (measurement). Describe comparability of assessment methods if there is more than one group | 5                  |
| Bias                      | 9      | Describe any efforts to address potential sources of bias                                                                                                                            | 5-6                |
| Study size                | 10     | Explain how the study size was arrived at                                                                                                                                            | 4                  |
| Quantitative variables    | 11     | Explain how quantitative variables were handled in the analyses. If applicable, describe which groupings were chosen and why                                                         | 6                  |
| Statistical methods       | 12     | (a) Describe all statistical methods, including those used to control for confounding                                                                                                | 6                  |
|                           |        | (b) Describe any methods used to examine subgroups and interactions                                                                                                                  | 6                  |
|                           |        | (c) Explain how missing data were addressed                                                                                                                                          | 4-6                |
|                           |        | (d) If applicable, describe analytical methods taking account of sampling strategy                                                                                                   | 6                  |
|                           |        | (e) Describe any sensitivity analyses                                                                                                                                                | 6                  |
| <b>Results</b>            |        |                                                                                                                                                                                      |                    |

|                          |     |                                                                                                                                                                                                              |            |
|--------------------------|-----|--------------------------------------------------------------------------------------------------------------------------------------------------------------------------------------------------------------|------------|
| Participants             | 13* | (a) Report numbers of individuals at each stage of study—eg numbers potentially eligible, examined for eligibility, confirmed eligible, included in the study, completing follow-up, and analysed            | 6-8        |
|                          |     | (b) Give reasons for non-participation at each stage                                                                                                                                                         | 6-8        |
|                          |     | (c) Consider use of a flow diagram                                                                                                                                                                           |            |
| Descriptive data         | 14* | (a) Give characteristics of study participants (eg demographic, clinical, social) and information on exposures and potential confounders                                                                     | 6-8        |
|                          |     | (b) Indicate number of participants with missing data for each variable of interest                                                                                                                          | 6-8        |
| Outcome data             | 15* | Report numbers of outcome events or summary measures                                                                                                                                                         | 6-8        |
| Main results             | 16  | (a) Give unadjusted estimates and, if applicable, confounder-adjusted estimates and their precision (eg, 95% confidence interval). Make clear which confounders were adjusted for and why they were included | 8-9        |
|                          |     | (b) Report category boundaries when continuous variables were categorized                                                                                                                                    | 6, 10-11   |
|                          |     | (c) If relevant, consider translating estimates of relative risk into absolute risk for a meaningful time period                                                                                             |            |
| Other analyses           | 17  | Report other analyses done—eg analyses of subgroups and interactions, and sensitivity analyses                                                                                                               | 8-9, 10-11 |
| <b>Discussion</b>        |     |                                                                                                                                                                                                              |            |
| Key results              | 18  | Summarise key results with reference to study objectives                                                                                                                                                     | 11         |
| Limitations              | 19  | Discuss limitations of the study, taking into account sources of potential bias or imprecision. Discuss both direction and magnitude of any potential bias                                                   | 11-15      |
| Interpretation           | 20  | Give a cautious overall interpretation of results considering objectives, limitations, multiplicity of analyses, results from similar studies, and other relevant evidence                                   | 11-15      |
| Generalisability         | 21  | Discuss the generalisability (external validity) of the study results                                                                                                                                        | 11-15      |
| <b>Other information</b> |     |                                                                                                                                                                                                              |            |
| Funding                  | 22  | Give the source of funding and the role of the funders for the present study and, if applicable, for the original study on which the present article is based                                                | 15         |

\*Give information separately for cases and controls in case-control studies and, if applicable, for exposed and unexposed groups in cohort and cross-sectional studies.

**Note:** An Explanation and Elaboration article discusses each checklist item and gives methodological background and published examples of transparent reporting. The STROBE checklist is best used in conjunction with this article (freely available on the Web sites of PLoS Medicine at <http://www.plosmedicine.org/>, Annals of Internal Medicine at <http://www.annals.org/>, and Epidemiology at <http://www.epidem.com/>). Information on the STROBE Initiative is available at [www.strobe-statement.org](http://www.strobe-statement.org).

# BMJ Open

## Baseline characteristics, survival and direct costs associated to treatment of gastric cancer patients at the National Oncology Institute of Panama from 2012 to 2015: a hospital-based observational study.

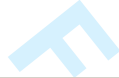

|                                 |                                                                                                                                                                                                                                                                                                                                                                                                                                                                                                                                                                                                                                                                                                                                                                                                                                                                                                                                                                                                                                                                                                                                                                                                                    |
|---------------------------------|--------------------------------------------------------------------------------------------------------------------------------------------------------------------------------------------------------------------------------------------------------------------------------------------------------------------------------------------------------------------------------------------------------------------------------------------------------------------------------------------------------------------------------------------------------------------------------------------------------------------------------------------------------------------------------------------------------------------------------------------------------------------------------------------------------------------------------------------------------------------------------------------------------------------------------------------------------------------------------------------------------------------------------------------------------------------------------------------------------------------------------------------------------------------------------------------------------------------|
| Journal:                        | <i>BMJ Open</i>                                                                                                                                                                                                                                                                                                                                                                                                                                                                                                                                                                                                                                                                                                                                                                                                                                                                                                                                                                                                                                                                                                                                                                                                    |
| Manuscript ID                   | bmjopen-2017-017266.R1                                                                                                                                                                                                                                                                                                                                                                                                                                                                                                                                                                                                                                                                                                                                                                                                                                                                                                                                                                                                                                                                                                                                                                                             |
| Article Type:                   | Research                                                                                                                                                                                                                                                                                                                                                                                                                                                                                                                                                                                                                                                                                                                                                                                                                                                                                                                                                                                                                                                                                                                                                                                                           |
| Date Submitted by the Author:   | 04-Jul-2017                                                                                                                                                                                                                                                                                                                                                                                                                                                                                                                                                                                                                                                                                                                                                                                                                                                                                                                                                                                                                                                                                                                                                                                                        |
| Complete List of Authors:       | Castro, Franz; Instituto Conmemorativo Gorgas de Estudios de la Salud, Department of Research and Health Technology Assessment<br>Shahal, David; Instituto Conmemorativo Gorgas de Estudios de la Salud, Department of Research and Health Technology Assessment<br>Tarajia, Musharaf; Instituto Conmemorativo Gorgas de Estudios de la Salud, Department of Research and Health Technology Assessment<br>Moreno Velásquez, Ilais; Instituto Conmemorativo Gorgas de Estudios de la Salud, Department of Research and Health Technology Assessment<br>Tribaldos Causadias, Maribel; Instituto Conmemorativo Gorgas de Estudios de la Salud, Department of Research and Health Technology Assessment<br>Herrera, Víctor; Instituto Conmemorativo Gorgas de Estudios de la Salud, Department of Research and Health Technology Assessment<br>Gómez, Beatriz; Instituto Conmemorativo Gorgas de Estudios de la Salud, Department of Research and Health Technology Assessment<br>Cukier, Moisés; National Oncology Institute<br>Motta, Jorge; Instituto Conmemorativo Gorgas de Estudios de la Salud, Department of Research and Health Technology Assessment; Secretaria Nacional de Ciencia Tecnología e Innovación |
| <b>Primary Subject Heading</b>: | Global health                                                                                                                                                                                                                                                                                                                                                                                                                                                                                                                                                                                                                                                                                                                                                                                                                                                                                                                                                                                                                                                                                                                                                                                                      |
| Secondary Subject Heading:      | Gastroenterology and hepatology                                                                                                                                                                                                                                                                                                                                                                                                                                                                                                                                                                                                                                                                                                                                                                                                                                                                                                                                                                                                                                                                                                                                                                                    |
| Keywords:                       | Gastric cancer, Survival, Health care costs, Panama                                                                                                                                                                                                                                                                                                                                                                                                                                                                                                                                                                                                                                                                                                                                                                                                                                                                                                                                                                                                                                                                                                                                                                |
|                                 |                                                                                                                                                                                                                                                                                                                                                                                                                                                                                                                                                                                                                                                                                                                                                                                                                                                                                                                                                                                                                                                                                                                                                                                                                    |

SCHOLARONE™  
Manuscripts

1  
2  
3  
4  
5  
6  
7  
8  
9  
10  
11  
12  
13  
14  
15  
16  
17  
18  
19  
20  
21  
22  
23  
24  
25  
26  
27  
28  
29  
30  
31  
32  
33  
34  
35  
36  
37  
38  
39  
40  
41  
42  
43  
44  
45  
46  
47  
48  
49  
50  
51  
52  
53  
54  
55  
56  
57  
58  
59  
60

Baseline characteristics, survival and direct costs associated to treatment of gastric cancer patients at the National Oncology Institute of Panama from 2012 to 2015: a hospital-based observational study.

Franz Castro MD<sup>1,2</sup>, David Shahal MD<sup>1,2</sup>, Musharaf Tarajia MD<sup>2</sup>, Ilais Moreno Velásquez MD PhD<sup>2</sup>, Maribel Tribaldos Causadias MD PhD<sup>2</sup>, Víctor Herrera MSc<sup>2</sup>, Beatriz Gómez MSc<sup>2</sup>, Moisés Cukier MD<sup>3</sup>, Jorge Motta MD MPH<sup>2,4</sup>

<sup>1</sup>Franz Castro and David Shahal equally contributed to this study.

<sup>2</sup>Department of Research and Health Technology Assessment, Gorgas Memorial Institute for Health Studies, Panama City, Panama

<sup>3</sup>Division of Surgical Oncology, National Oncology Institute, Panama City, Panama

<sup>4</sup>National Secretariat for Science and Technology, Panama City, Panama

Correspondence to:

David Shahal

Department of Research and Health Technology Assessment, Gorgas Memorial Institute for Health Studies, Panama City, Panama; (e-mail: davidshahal@gmail.com)

Abstract word count: 293 words.

Manuscript word count: 3761 words.

Tables and figures count: 4 tables, 1 figure.

1  
2  
3 Keywords: Gastric cancer; Survival; Health care costs; Panama.  
4

5 Abstract  
6

7  
8 Objectives: Comprehensive epidemiological and economic studies of gastric cancer  
9 (GC) in Panama are limited. This study aims to evaluate the association between  
10 socioeconomic and clinical variables with survival, describe the survival outcomes  
11 according to clinical stage, and estimate the direct costs associated to GC care in a  
12 Panamanian population with GC.  
13

14  
15 Design and setting: A retrospective observational study was conducted at the leading  
16 public institution for cancer treatment in Panama.  
17

18  
19 Participants: Data was obtained from 611 records of patients diagnosed with gastric  
20 adenocarcinoma (codes C16.0-C16.9 of the International Classification of Diseases  
21 10th revision, ICD-10), identified between January 1<sup>st</sup>, 2012 and December 31<sup>st</sup>, 2015.  
22 Methods: Cox proportional hazards models were used to calculate hazard ratios (HR)  
23 with 95% confidence intervals (95%CI) to examine associations between the  
24 variables and survival. Kaplan-Meier curves were used to assess overall and stage-  
25 specific survival. Direct costs (based on 2015 USD) were calculated per patient using  
26 standard costs provided by the institution for hospital admission (occupied bed-days),  
27 radiotherapy, surgery and chemotherapy, yielding total and overall mean costs (OMC).  
28 A comparison of OMC between groups (sex, social security status, clinical stage) was  
29 performed applying the bootstrap method with a t-test of unequal variances.  
30  
31

32  
33 Results: An increased risk of dying was observed for patients without social security  
34 coverage (HR: 2.02; 95%CI: 1.16-3.53), overlapping tumors (HR: 1.50; 95%CI: 1.02-  
35 2.22), poorly-differentiated tumors (HR: 2.27; 95%CI: 1.22-4.22), and stage IV disease  
36 (HR: 5.54; 95%CI: 3.38-9.08) (adjusted models). Overall one-year survival rate was  
37 41%. The estimated OMC of GC care per patient was 4,259 USD. No statistically  
38 significant differences were found in OMC between groups.  
39  
40

41  
42 Conclusions: Socioeconomic disparities influence GC outcomes and healthcare  
43 utilization. Policies addressing healthcare disparities related to GC are needed, as well  
44 as in-depth studies evaluating barriers of access to GC related services.  
45  
46  
47  
48  
49  
50  
51  
52  
53  
54  
55  
56  
57  
58  
59  
60

1  
2  
3 Strengths and limitations of this study:  
4

- 5
- 6 • Strengths of this study include:
    - 7 ○ Data regarding patient deaths was ascertained with the National
    - 8 Mortality Registry.
    - 9 ○ The use of actual chemotherapeutic doses administered allowed a more
    - 10 accurate calculation of medication costs.
    - 11 ○ Applying the bootstrap method for mean cost comparison purposes
    - 12 provided us with a more flexible tool to compare costs.
    - 13
  - 14 • Limitations of this study include:
    - 15 ○ This study encompassed patients from a single cancer institution and
    - 16 our results cannot be extrapolated to the whole population, however,
    - 17 the National Oncology Institute of Panama is the biggest and main
    - 18 cancer referral public hospital in the country.
    - 19 ○ There was a considerable amount of underreporting and missing
    - 20 variables such as incomplete data regarding chemotherapy protocol
    - 21 sessions, resource utilization and outpatient expenses, which most
    - 22 likely led to underestimation of costs.
    - 23
    - 24
    - 25
    - 26
    - 27
    - 28
    - 29
    - 30
    - 31
    - 32
    - 33
    - 34
    - 35
    - 36
    - 37
    - 38
    - 39
    - 40
    - 41
    - 42
    - 43
    - 44
    - 45
    - 46
    - 47
    - 48
    - 49
    - 50
    - 51
    - 52
    - 53
    - 54
    - 55
    - 56
    - 57
    - 58
    - 59
    - 60



## 1. Introduction

Latin-America presents one of the highest incidences of Gastric Cancer (GC) worldwide.<sup>1</sup> In 2011, GC was responsible for the sixth highest incidence, and the highest mortality rate from cancer in Panama.<sup>2</sup> Although GC treatment is evolving rapidly at the expense of increasing costs of care, there is scarcity of comprehensive epidemiological and economical studies of GC in the region.<sup>3</sup>

Understanding the epidemiology of GC and its costs in low-and middle-income countries is a crucial step to addressing the burden of GC and will guide disease surveillance, screening, prevention activities as well as healthcare resource allocation. Thus, the aims of this study were to evaluate the association between socioeconomic and clinical variables with survival, describe the survival outcomes according to clinical stage, and describe the direct costs associated to GC care in a Panamanian population with GC.

## 2. Methods

### 2.1. Study population

A descriptive, hospital-based retrospective study was conducted at the National Oncology Institute (NOI). The NOI is the leading public institution for cancer treatment in Panama, receiving cases referred from all over the country.<sup>4 5</sup>

Data derived from patient records (electronic and paper-based) with a histopathological diagnosis of gastric adenocarcinoma having their first appointment at the NOI between January 1st, 2012 and December 31st, 2015 was retrieved. Cases were registered according to codes C16.0 to C16.9 based on the tenth revision of the International Classification of Diseases (ICD-10).

A list containing 697 patients was provided by the Department of Clinical Files at the NOI. A total of 12 clinical records could not be located and were therefore excluded. Of the remaining 685 records, those with a diagnosis different from gastric adenocarcinoma were excluded (mucosa-associated lymphoid tissue (MALT) lymphomas, gastrointestinal stromal tumors (GIST), neuroendocrine tumors (NETs), sarcomas, as well as tumors confirmed to be from a different primary site (e.g., esophageal), for a total study population of 611 patients (Supplementary Figure 1).

Patient deaths from 2012 to 2015 were verified with the National Mortality Registry (NMR) supplied by the National Institute of Statistics and Census of Panama (Instituto Nacional de Estadística y Censo, INEC), using all-cause mortality data. This database comprises all deaths reported either from the Civil Registry or the Institute of Legal Medicine (deaths due to external causes). A recent study that assessed civil registration and vital statistics systems reported the quality of Panamanian data as

1  
2  
3 high<sup>6</sup> The research protocol was approved by the Gorgas Memorial Institute Ethics  
4 Committee and the Ministry of Health.  
5  
6  
7

## 8 9 2.2. Study variables

10 Socioeconomic (sex, age at diagnosis, social security status, employment status,  
11 marital status, province of residence, ethnicity) and clinical variables (location by  
12 endoscopy, histological type, tumor grade and clinical stage) were recorded. Costs  
13 were ascertained using length of stay in hospital, surgical procedures performed,  
14 chemotherapy and radiotherapy received.  
15  
16

17 Age at diagnosis was categorized considering the cutoff value of 45 years for early  
18 onset GC (EOGC), as done in previous studies,<sup>7</sup> and age strata as reported by the  
19 Surveillance, Epidemiology, and End Results (SEER).<sup>8</sup> Social security status was  
20 categorized as having or not coverage by health institutions of the Panamanian Social  
21 Insurance Fund, in which a monthly amount is discounted from contributors' salaries  
22 (active public and private workforce) in order to receive health coverage for them and  
23 their first degree relatives, allowing children and unemployed adults to have coverage  
24 (beneficiaries). The Social Insurance Fund also serves as a retirement fund for  
25 workers at a certain age (retired), or in case of permanent disability (pensioners). The  
26 NOI is not an institution from the Panamanian Social Insurance Fund, but patients  
27 with social security are granted free healthcare services, while those without social  
28 security are required to pay out-of-pocket fees. Nevertheless, all patients receive the  
29 same standards of care despite their insurance status.<sup>9</sup> Formal and informal  
30 employment groups were categorized as defined by the International Labour Office.<sup>10</sup>  
31  
32  
33  
34

35 Provinces of residence were grouped according to geographic proximity to the NOI  
36 and common socioeconomic characteristics,<sup>11</sup> and categorized as Panama and Colon,  
37 Veraguas and Cocle, Herrera and Los Santos and Other provinces (Bocas del Toro,  
38 Chiriqui, Darien, Guna Yala, Ngäbe-Bugle).  
39  
40

41 Anatomic location of the tumor was based on endoscopic reports and categorized  
42 as non-cardia, cardia and overlapping. Cases in which the endoscopic report could not  
43 be found in the clinical files were labeled as "unspecified".<sup>12</sup> Histological type was  
44 based on the Lauren classification (intestinal, diffuse),<sup>13</sup> and mixed tumors were  
45 shown as a different category.<sup>14</sup> Tumor grade was categorized using ICD for Oncology  
46 (ICD-O), and clinical stage was based on the 7th edition of the TNM Staging System of  
47 the American Joint Committee on Cancer (AJCC), taking into consideration the first  
48 staging reported in the clinical file by the physician at the NOI.<sup>15</sup>  
49  
50  
51

52 Type of care was defined according to hospital admission (recorded as occupied  
53 bed days), radiotherapy (number of sessions), surgery and chemotherapy. Surgery  
54 was defined as the performance of gastrectomy (total, subtotal) with lymph node  
55 resection, gastroenteric anastomosis, stent placement (esophageal, duodenal) or  
56  
57  
58  
59  
60

1  
2  
3 exploratory laparotomy. Chemotherapy regimens for GC were based on the latest  
4 National Comprehensive Cancer Network (NCCN) guidelines.  
5

6  
7 Because the intention of treatment (e.g., curative vs palliative) was under-reported  
8 in the patient records, and due to the possibility of non-completion of regimens (loss  
9 to follow-up or death) or change in the regimen received (e.g., progression of disease,  
10 differences between clinical TNM and pathological TNM), expenditure on  
11 chemotherapy was calculated using actual medication doses and sessions  
12 administered on an individual basis instead of assuming completion of a single,  
13 invariable regimen.  
14

### 15 16 2.3. Statistical analyses 17

18 Qualitative variables were expressed as percentages. As a complementary analysis,  
19 cases per 100,000 population were calculated for each province individually, using  
20 population data from the INEC.<sup>16</sup> Kaplan Meier curves were used to examine overall  
21 survival for all patients and for each clinical stage group. Median survival and median  
22 follow-up times in days were calculated and one-year survival rates were reported.  
23 Due to the length of the study period, we were not able to calculate 5 year survival  
24 rates.  
25  
26

27  
28 Cox proportional hazards models were used to examine the association between  
29 socioeconomic and clinical variables with survival. Crude hazard ratios (HR) and 95%  
30 confidence intervals (95% CI) were estimated. Adjusted models including all variables  
31 were also performed, in order to evaluate their impact on the results obtained.  
32 Ethnicity was evaluated, however excluded from the final model due to the high  
33 admixture of the Panamanian population. Due to statistical power, provinces of  
34 residence were grouped as previously mentioned. In order to avoid collinearity, we  
35 performed sensitivity analyses by running two different adjusted models, one  
36 including tumor grade but not histological type, and another one including histological  
37 type but not tumor grade, observing similar point estimates. The assumption of  
38 proportional risk was verified using the Schoenfeld residuals method.  
39  
40  
41

42  
43 Total direct costs of care, expressed in US dollars (USD), were calculated per  
44 patient and for the whole study population using standard unit costs provided by the  
45 NOI and the Ministry of Health. Since no variation in costs was seen along the 2012-  
46 2015 period, calculations were based on 2015 estimates.  
47  
48

49 Total and mean direct costs were calculated according to social security status,  
50 sex, and clinical stage. Overall mean cost (OMC) comparisons among groups were  
51 performed using the bootstrap method.<sup>17</sup> This involved repeated resampling (1000  
52 repetitions) of the original cost data by random selection. After resampling, a t-test  
53 with unequal variances was conducted to compare means and a p-value was reported.  
54  
55

56 Statistical analyses were performed using SPSS 20.0 and Stata 14.0.  
57  
58  
59  
60

### 3. Results

Table 1 shows the socioeconomic and clinical variables of the study population. Overall, 62.2% of the total population were males, 77.4% had social security and 34.9% were unemployed. The group of provinces of Panama and Colon reported the highest number of patients (64.5%). According to age groups, 14.7% were younger than 45 years old, whereas 26.0% were  $\geq 75$  years old. Median (interquartile range) age at diagnosis was 65 (52-75) years. Regarding the complementary analysis, when calculating the number of cases per 100,000 population by province separately, Herrera had 8.29 cases per 100,000, followed by Veraguas with 6.58. Among patients where ethnicity was reported (n=608), 83.2% patients were registered as Mestizo.

Based on endoscopic findings, tumors were most commonly reported as overlapping, observed in 46% of the patients. According to the histological classification, a predominance of intestinal type adenocarcinomas was observed (53.7%). Poorly differentiated tumors were observed in 62.3% of patients. Out of the 611 patients, 52.9% had the clinical stage recorded. From these cases, 4.6% were categorized as stage I, 13.9% as stage II, 15.8% and 65.6% as stage III and IV, respectively.

**Table 1**  
Socioeconomic and clinical variables of patients with gastric cancer treated at the NOI. 2012-2015.

| Socioeconomic and clinical variables | n       | %    |
|--------------------------------------|---------|------|
| Sex                                  |         |      |
| Female                               | 231/611 | 37.8 |
| Male                                 | 380/611 | 62.2 |
| Age                                  |         |      |
| Less than 45 years                   | 90/611  | 14.7 |
| 45-64 years                          | 207/611 | 33.9 |
| 65-74 years                          | 155/611 | 25.4 |
| 75 years or more                     | 159/611 | 26.0 |
| Social security status               |         |      |
| With social security                 | 473/611 | 77.4 |
| Without social security              | 138/611 | 22.6 |
| Employment status <sup>a</sup>       |         |      |
| Formal employment                    | 116/610 | 19.0 |
| Informal employment                  | 119/610 | 19.5 |
| Retired/pensioner                    | 162/610 | 26.6 |
| Unemployed                           | 213/610 | 34.9 |
| Marital status <sup>b</sup>          |         |      |
| Married/common law marriage          | 397/610 | 65.1 |
| Single                               | 161/610 | 26.4 |
| Widowed                              | 52/610  | 8.5  |
| Province of residence                |         |      |
| Panama and Colon                     | 394/611 | 64.5 |

|                                |         |      |
|--------------------------------|---------|------|
| Veraguas and Cocle             | 118/611 | 19.3 |
| Herrera and Los Santos         | 57/611  | 9.3  |
| Other provinces <sup>c</sup>   | 42/611  | 6.9  |
| Ethnicity <sup>d</sup>         |         |      |
| White                          | 71/608  | 11.7 |
| Mestizo                        | 506/608 | 83.2 |
| Afrocaribbean                  | 23/608  | 3.8  |
| Indigenous                     | 8/608   | 1.3  |
| Anatomic location by endoscopy |         |      |
| Non-cardia                     | 239/611 | 39.1 |
| Cardia                         | 69/611  | 11.3 |
| Overlapping                    | 281/611 | 46.0 |
| Unspecified                    | 22/611  | 3.6  |
| Histologic type <sup>e</sup>   |         |      |
| Intestinal type                | 232/432 | 53.7 |
| Diffuse type                   | 154/432 | 35.6 |
| Mixed type                     | 46/432  | 10.6 |
| Tumor grade <sup>f</sup>       |         |      |
| Well/moderately differentiated | 223/592 | 37.7 |
| Poorly differentiated          | 369/592 | 62.3 |
| Clinical stage <sup>g</sup>    |         |      |
| I                              | 15/323  | 4.6  |
| II                             | 45/323  | 13.9 |
| III                            | 51/323  | 15.8 |
| IV                             | 212/323 | 65.6 |

<sup>a</sup>Employment status: 1 missing; <sup>b</sup>Marital status: 1 missing; <sup>c</sup>Other provinces: 7 from Bocas del Toro, 20 from Chiriqui, 12 from Darien, 1 from GunaYala, and 2 from Ngäbe-Bugle; <sup>d</sup>Ethnicity: 3 missing; <sup>e</sup>Histologic type: 179 missing; <sup>f</sup>Tumor grade: only 1 undifferentiated, 18 missing; <sup>g</sup>Clinical stage: 288 missing.

### 3.1. Mortality

In total, n=407 (67.5%) patients died of any cause during the study period. Figure 1 shows overall and stage-specific survival curves. Overall one-year survival rate was 41%, median survival was 287 days (9.5 months) and median follow-up was 604 days (20.1 months). Patients with stage I disease had a one-year survival rate of 93%, whereas stages II, III and IV presented a 78%, 76% and 38% one-year survival rate, respectively.

Table 2 presents the associations between socioeconomic and clinical variables with deaths from all causes. In the adjusted models, patients without social security presented a higher risk of dying (HR: 2.02; 95% CI: 1.16-3.53) compared to those with social security. Regarding anatomic location, having an overlapping tumor was related with an increased risk of dying (HR: 1.50; 95% CI: 1.02-2.22) in comparison to non-cardia tumors. Poorly differentiated tumors were associated with a higher risk of dying (HR: 2.27; 95% CI: 1.22-4.22) compared to well/moderately differentiated tumors, as well as those with stage IV disease (HR: 5.54; 95% CI: 3.38-9.08) in comparison to stage I-III disease.

**Table 2**

Cox proportional hazards models for the associations between socioeconomic and clinical variables with deaths from all causes in patients treated at the NOI, 2012-2015.

| Socioeconomic and clinical variables        | Crude HR                |                                | Adjusted HR <sup>g</sup> |                                |
|---------------------------------------------|-------------------------|--------------------------------|--------------------------|--------------------------------|
|                                             | HR                      | 95% CI                         | HR                       | 95% CI                         |
| Sex                                         |                         |                                |                          |                                |
| Female                                      | Reference               |                                | Reference                |                                |
| Male                                        | 0.93                    | (0.70-2.13)                    | 0.67                     | (0.41-1.01)                    |
| Age                                         |                         |                                |                          |                                |
| 45-64 years                                 | Reference               |                                | Reference                |                                |
| Less than 45 years                          | 1.43                    | (0.96-2.13)                    | 0.91                     | (0.53-1.58)                    |
| 65-74 years                                 | 0.90                    | (0.61-1.32)                    | 0.66                     | (0.38-1.16)                    |
| 75 years or more                            | 1.14                    | (0.78-1.68)                    | 1.68                     | (0.91-3.10)                    |
| Social security status                      |                         |                                |                          |                                |
| With social security                        | Reference               |                                | Reference                |                                |
| Without social security                     | <b>1.44<sup>f</sup></b> | <b>(1.01-2.05)<sup>f</sup></b> | <b>2.02<sup>f</sup></b>  | <b>(1.16-3.53)<sup>f</sup></b> |
| Employment status <sup>a</sup>              |                         |                                |                          |                                |
| Formal employment                           | Reference               |                                | Reference                |                                |
| Informal employment                         | 1.04                    | (0.66-1.63)                    | 1.29                     | (0.68-2.44)                    |
| Retired/pensioner                           | 0.87                    | (0.57-1.35)                    | 1.48                     | (0.78-2.79)                    |
| Unemployed                                  | 1.12                    | (0.77-1.65)                    | 0.75                     | (0.40-1.44)                    |
| Marital status <sup>b</sup>                 |                         |                                |                          |                                |
| Married/common law marriage                 | Reference               |                                | Reference                |                                |
| Single                                      | 1.06                    | (0.76-1.47)                    | 0.87                     | (0.57-1.32)                    |
| Widowed                                     | 0.72                    | (0.41-1.25)                    | 0.57                     | (0.24-1.37)                    |
| Province                                    |                         |                                |                          |                                |
| Panama and Colon                            | Reference               |                                | Reference                |                                |
| Veraguas and Cocle                          | 0.87                    | (0.58-1.32)                    | 0.86                     | (0.50-1.47)                    |
| Herrera and Los Santos                      | 0.62                    | (0.36-1.07)                    | 0.71                     | (0.33-1.52)                    |
| Other provinces                             | 0.82                    | (0.48-1.41)                    | 1.06                     | (0.48-2.33)                    |
| Anatomic location by endoscopy <sup>c</sup> |                         |                                |                          |                                |
| Non-cardia                                  | Reference               |                                | Reference                |                                |
| Cardia                                      | 1.30                    | (0.78-2.19)                    | 0.94                     | (0.42-2.13)                    |
| Overlapping                                 | 1.34                    | (0.99-1.83)                    | <b>1.50<sup>f</sup></b>  | <b>(1.02-2.22)<sup>f</sup></b> |
| Histologic type <sup>d</sup>                |                         |                                |                          |                                |
| Intestinal type                             | Reference               |                                | Reference                |                                |
| Diffuse type                                | <b>1.64<sup>f</sup></b> | <b>(1.13-2.40)<sup>f</sup></b> | 0.79                     | (0.43-1.47)                    |
| Mixed type                                  | <b>2.12<sup>f</sup></b> | <b>(1.31-3.44)<sup>f</sup></b> | 1.57                     | (0.80-3.07)                    |
| Tumor grade <sup>e</sup>                    |                         |                                |                          |                                |
| Well/moderately differentiated              | Reference               |                                | Reference                |                                |
| Poorly differentiated                       | <b>1.91<sup>f</sup></b> | <b>(1.38-2.65)<sup>f</sup></b> | <b>2.27<sup>f</sup></b>  | <b>(1.22-4.22)<sup>f</sup></b> |
| Clinical stage                              |                         |                                |                          |                                |
| I-III                                       | Reference               |                                | Reference                |                                |
| IV                                          | <b>4.37<sup>f</sup></b> | <b>(3.02-6.33)<sup>f</sup></b> | <b>5.54<sup>f</sup></b>  | <b>(3.38-9.08)<sup>f</sup></b> |

<sup>a</sup>Employment status: 1 missing; <sup>b</sup>Marital status: 1 missing; <sup>c</sup>Anatomic location: 11 missing; <sup>d</sup>Histologic type: 83 missing;

<sup>e</sup>Tumor grade: 9 missing; <sup>f</sup>p < 0.05; <sup>g</sup>Adjustments were performed including all the covariates.

### 3.2. Costs

A total of 524 patients (85.8%) received any type of care, for an overall total cost of 2,231,728 USD and an OMC per patient of 4,259 USD (95% CI: 3,915-4,603), as shown in Table 3. Baseline characteristics of the 87 patients (14.2%) that did not receive any type of care are shown in Supplementary Table 1. When stratifying patients by type of care, 73.5% were admitted to the NOI, 66.4% were given chemotherapy, 30.3% underwent a surgical procedure, and 18% received radiotherapy. The highest expenses were attributed to hospital admissions (1,156,460 USD). Chemotherapy accounted for the second highest total cost (652,370 USD), being three times greater than the total cost of radiotherapy (206,872 USD). However, when comparing mean costs, radiotherapy exceeded chemotherapy by 274 USD per patient. For surgical procedures the total cost was 216,026 USD, representing 9.7% of the overall cost.

**Table 3**

Direct cost estimates (total and means) according to type of care received in patients with gastric cancer at the NOI. 2012-2015.

| Type of care       | Patients receiving care (%) <sup>a</sup> | Total cost (USD)       | Mean cost per patient (USD) | 95% CI        |
|--------------------|------------------------------------------|------------------------|-----------------------------|---------------|
| Overall            | 524/611 (85.8)                           | 2,231,728              | 4,259                       | (3,915-4,603) |
| Hospital admission | 449/611 (73.5)                           | 1,156,460 <sup>b</sup> | 2,576 <sup>b</sup>          | (2,359-2,792) |
| Radiotherapy       | 110/611 (18.0)                           | 206,872                | 1,881                       | (1,729-2,033) |
| Chemotherapy       | 406/611 (66.4)                           | 652,370                | 1,607                       | (1,363-1,851) |
| Surgery            | 185/611 (30.3)                           | 216,026                | 1,168                       | (1,077-1,259) |

USD: US dollars; CI: Confidence intervals; <sup>a</sup>Since a single patient could receive different types of care, calculations were made separately for each category and percentages do not add up to 100%; <sup>b</sup>Calculated for occupied bed-days.

Table 4 presents the costs stratified by sex, social security status and disease stage groups, according to type of care received. Women had an OMC per patient of 4,258 USD, while for men it was 4,260 USD. For those with social security, the OMC per patient was 4,414 USD, whereas for those without social security, it was 3,657 USD. Patients with stage I-III disease presented an OMC of 5,174 USD, compared to 4,930 USD for those with stage IV disease (see Supplementary Figure 2 for detailed cost distributions). No statistically significant differences were observed in the OMC between groups.

**Table 4**

Direct cost estimates by sex, social security status and clinical stage of patients with gastric cancer according to type of care received at the NOI. 2012-2015.

| Type of care | Male patients<br>n=380         |                    |               | Female patients<br>n=231       |                    |               | Bootstrap p-value |
|--------------|--------------------------------|--------------------|---------------|--------------------------------|--------------------|---------------|-------------------|
|              | Received care (%) <sup>a</sup> | Mean cost (USD)    | 95% CI        | Received care (%) <sup>a</sup> | Mean cost (USD)    | 95% CI        |                   |
| O            | 324/380 (85.3)                 | 4,260              | (3,789-4,731) | 200/231 (86.6)                 | 4,258              | (3,774-4,741) | 0.994             |
| HA           | 281/380 (73.9)                 | 2,487 <sup>b</sup> | (2,219-2,755) | 168/231 (72.7)                 | 2,724 <sup>b</sup> | (2,340-3,108) |                   |

|                     |                                                |                        |               |                                                   |                        |               |                          |
|---------------------|------------------------------------------------|------------------------|---------------|---------------------------------------------------|------------------------|---------------|--------------------------|
| CT                  | 247/380<br>(65.0)                              | 1,694                  | (1,257-2,131) | 159/231<br>(68.8)                                 | 1,472                  | (1,204-1,740) |                          |
| RT                  | 69/380<br>(18.2)                               | 1,915                  | (1,695-2,135) | 41/231<br>(17.7)                                  | 1,823                  | (1,582-2,064) |                          |
| SR                  | 117/380<br>(30.8)                              | 1,118                  | (1,028-1,209) | 68/231<br>(29.4)                                  | 1,253                  | (1,074-1,432) |                          |
|                     | <b>Patients with social security<br/>n=473</b> |                        |               | <b>Patients without social security<br/>n=138</b> |                        |               |                          |
| <b>Type of care</b> | <b>Received care (%)<sup>a</sup></b>           | <b>Mean cost (USD)</b> | <b>95% CI</b> | <b>Received care (%)<sup>a</sup></b>              | <b>Mean cost (USD)</b> | <b>95% CI</b> | <b>Bootstrap p-value</b> |
| O                   | 417/473<br>(88.2)                              | 4,414                  | (4,014-4,813) | 107/138<br>(77.5)                                 | 3,657                  | (3,014-4,299) | 0.059                    |
| HA                  | 357/473<br>(75.5)                              | 2,562 <sup>b</sup>     | (2,318-2,806) | 92/138<br>(66.7)                                  | 2,628 <sup>b</sup>     | (2,111-3,145) |                          |
| CT                  | 326/473<br>(68.9)                              | 1,722                  | (1,376-2,069) | 80/138<br>(58.0)                                  | 1,136                  | (833-1,439)   |                          |
| RT                  | 93/473<br>(19.7)                               | 1,848                  | (1,665-2,031) | 17/138<br>(12.3)                                  | 2,060                  | (1,702-2,417) |                          |
| SR                  | 160/473<br>(33.8)                              | 1,202                  | (1,103-1,302) | 25/138<br>(18.1)                                  | 945                    | (871-1,019)   |                          |
|                     | <b>Stage I - III<br/>n=111</b>                 |                        |               | <b>Stage IV<br/>n=212</b>                         |                        |               |                          |
| <b>Type of care</b> | <b>Received care (%)<sup>a</sup></b>           | <b>Mean cost (USD)</b> | <b>95% CI</b> | <b>Received care (%)<sup>a</sup></b>              | <b>Mean cost (USD)</b> | <b>95% CI</b> | <b>Bootstrap p-value</b> |
| O                   | 108/111<br>(97.3)                              | 5,174                  | (4,516-5,832) | 201/212<br>(94.8)                                 | 4,930                  | (4,330-5,529) | 0.598                    |
| HA                  | 86/111<br>(77.5)                               | 2,994 <sup>b</sup>     | (2,353-3,635) | 179/212<br>(84.4)                                 | 2,853 <sup>b</sup>     | (2,484-3,221) |                          |
| CT                  | 85/111<br>(76.6)                               | 890                    | (683-1,097)   | 173/212<br>(81.6)                                 | 2,055                  | (1,579-2,530) |                          |
| RT                  | 60/111<br>(54.1)                               | 2,341                  | (2,243-2,440) | 27/212<br>(12.7)                                  | 1,297                  | (897-1,697)   |                          |
| SR                  | 85/111<br>(76.6)                               | 1,003                  | (930-1,075)   | 69/212<br>(32.5)                                  | 1,302                  | (1,127-1,477) |                          |

O: Overall; HA: Hospital admission; CT: Chemotherapy; RT: Radiotherapy; SR: Surgery; USD: US dollars; CI: Confidence intervals; <sup>a</sup>Since a single patient could receive different types of care, calculations were made separately for each category and percentages do not add up to 100%. <sup>b</sup>Calculated for occupied bed-days.

#### 4. Discussion

Our findings suggest that lack of social security, a poorly differentiated tumor, clinical stage IV and overlapping anatomic location were associated with an increased risk of dying, independently of other socioeconomic and clinical variables. Furthermore, the overall one-year survival rate in our study was 41% and the estimated OMC of GC care per patient was 4,259 USD.

Socioeconomic factors such as insurance coverage and geographic location have been implicated in survival outcomes and healthcare disparities.<sup>18-22</sup> Likewise, cultural differences have been documented as strong factors influencing medical care in many Latin American countries, especially in cancer.<sup>21 23</sup> According to national



1  
2  
3 estimates, 80% of the Panamanian population has social security, of which 57% are  
4 active workers and 43% are beneficiaries.<sup>24</sup> In our results, patients without social  
5 security had a two-fold higher risk of dying in comparison to those with social  
6 security. Similarly, in Colombia, patients with a more affluent socioeconomic status  
7 and a private health insurance regimen had a significantly higher GC survival.<sup>25</sup> The  
8 lack of social security has been related to late stage diagnosis,<sup>26</sup> and health insurance  
9 regimes facilitate greater access to physician care and increase medical service  
10 utilization, thus granting patients longer survival times.<sup>27</sup> In addition, reports on other  
11 types of cancer in Panama have identified lack of social security as a barrier in access  
12 to healthcare.<sup>4 5</sup> Likewise, a previous study conducted in Sweden has shown the  
13 importance of socioeconomic factors in GC survival, where a higher educational level  
14 was associated with a higher survival and patients living in rural areas had a higher  
15 risk of dying due to this type of cancer.<sup>28</sup> Of note, one third of our patients were  
16 unemployed, most of them being older than 65 years and beneficiaries from the social  
17 security system. The higher proportion of unemployed patients observed, compared  
18 to another study of GC in the region,<sup>29</sup> highlights the importance of social security as  
19 an aid in front of the complex socioeconomic situation of this population, heavily  
20 dependent on having a formally-employed relative in order to have better access to  
21 GC-related services. Taken together, these findings emphasize the importance of  
22 socioeconomic determinants in the disease outcomes of GC.  
23  
24  
25  
26  
27  
28  
29

30 Geographic disparities in Panama are a well-known problem, as for some  
31 indigenous and other remote regions, human resources and equipment available for  
32 diagnosis and treatment are limited.<sup>30</sup> Together, Panama and Colon comprise more  
33 than half of the national population and have higher access to healthcare services, one  
34 of them being host to the NOI.<sup>31</sup> Herrera was the province with most patients treated  
35 at the NOI per 100,000 population, which could be explained by the fact of having the  
36 country's highest number of health professionals per capita,<sup>31</sup> giving the patients  
37 higher chances of being diagnosed and referred to the NOI. Nevertheless, with half of  
38 the amount of health professionals per capita, Veraguas province was second in  
39 patients treated at the NOI per 100,000 population, and according to national  
40 estimates it ranks first in incidence and second in mortality in the country.<sup>32</sup>  
41 Interestingly, the provinces of Veraguas and Cocolé, despite having the highest  
42 proportion of their patients with stage IV disease (74.1% and 69.6% respectively),  
43 accounted for two of the smallest proportions of their residents being diagnosed in  
44 institutions inside their territory (10.9% and 7.4% respectively). Although geography  
45 was not associated with a higher risk of dying in our study, these findings underscore  
46 the need of further research on GC to determine geographical disparities in depth, as  
47 well as lifestyle, environmental, genetic factors, and the interaction among them.<sup>33-36</sup>  
48  
49  
50  
51  
52  
53

54 In agreement with other studies,<sup>12 37</sup> the male to female ratio was 1.64 and GC was  
55 most common in the elderly.<sup>12 38</sup> Nevertheless, we found a high proportion of EOGC  
56 (14.7%) compared to those reported in most countries of the region,<sup>38</sup> only surpassed  
57 by Guatemala in Central-America with national estimates of 16.5%,<sup>12</sup> a comparison  
58  
59  
60

1  
2  
3 worth noting even if our results are based on a single institution. Likewise, in a  
4 hospital-based study conducted in Mexico, a similar proportion of EOGC was  
5 reported.<sup>39</sup> These discrepancies might mirror differences in underreporting,  
6 environmental risk factors (other infections, exposure to chemicals, alcohol  
7 consumption), genetic susceptibility and information seeking patterns, making it  
8 difficult to compare.  
9

10 Clinical stage was only reported in half of the patients, a five-fold lower rate than  
11 that reported by the SEER,<sup>8</sup> and twice as low as the one reported in a community in  
12 Chile.<sup>40</sup> Moreover, two thirds had stage IV disease, compared to 25% and 60%, as  
13 reported in other studies from developed and developing countries.<sup>40 41</sup> It is widely  
14 known that being initially diagnosed at an advanced clinical stage of the disease  
15 correlates with delayed diagnosis.<sup>42</sup> Given that up to 50% of GC patients have  
16 unspecific gastrointestinal symptoms,<sup>43</sup> and alarm symptoms are usually present at  
17 advanced stage in most cases,<sup>44 45</sup> early diagnosis is a challenge. Remarkably, 14.2% of  
18 the patients in our study were diagnosed and then lost to follow-up for receiving any  
19 type of care, compared to other studies that have shown higher compliance rates to  
20 appointments or treatment.<sup>46</sup> These patients were mostly male, 75 years or older, had  
21 social security coverage (this includes beneficiaries), were unemployed, were married  
22 or in a common law marriage, belonged to the group of provinces of Panama and  
23 Colon, and were described as being Mestizo. It is well known that socioeconomic  
24 disparities negatively influence access to endoscopic services causing delayed  
25 diagnoses,<sup>47 48</sup> access to further appointments, and inadequate adherence to  
26 treatment,<sup>49</sup> and might have hampered the successful staging and follow-up of  
27 patients.  
28  
29

30 Non-cardia tumors were three times as frequent as cardia tumors, and intestinal  
31 type tumors were predominant versus diffuse type tumors, a consistent finding in the  
32 region.<sup>12 38</sup> However, poorly differentiated tumors were twice as common in  
33 comparison to the well/moderately differentiated group. Despite the histological  
34 paradigm stating that intestinal type tumors are well differentiated and that diffuse  
35 type tumors are poorly differentiated,<sup>50 51</sup> other studies have reported similar  
36 results.<sup>52 53</sup> Yet, a possible explanation for this discordance is the high under-reporting  
37 of the histological type variable versus the almost complete reporting of the tumor  
38 grade variable.  
39  
40

41 The one year survival rate was 41%, higher than those from other studies of the  
42 region (32%) but lower in comparison to developed countries (57%).<sup>8 25</sup> Other studies  
43 have shown that unfavorable clinical and histological features (advanced clinical  
44 stage, diffuse type, overlapping and poorly differentiated tumors) are poor prognostic  
45 factors for GC survival.<sup>40 54</sup> Nevertheless, our survival estimates should be interpreted  
46 with caution, given that our study only included patients attending the NOI. National  
47 studies are needed to determine the true GC rates of the whole Panamanian  
48 population.  
49  
50  
51  
52  
53  
54  
55  
56  
57  
58  
59  
60

1  
2  
3  
4  
5  
6  
7  
8  
9  
10  
11  
12  
13  
14  
15  
16  
17  
18  
19  
20  
21  
22  
23  
24  
25  
26  
27  
28  
29  
30  
31  
32  
33  
34  
35  
36  
37  
38  
39  
40  
41  
42  
43  
44  
45  
46  
47  
48  
49  
50  
51  
52  
53  
54  
55  
56  
57  
58  
59  
60

Published data regarding costs of cancer care are limited in Latin-America. A recent study conducted in Chile, evaluating direct and indirect costs of cancer (expressed as 2012 USD), reported that GC accounted for the highest direct costs among all cancers.<sup>18</sup> In a report published by the Panamanian Ministry of Health in 2010, GC was responsible for the fourth highest cost among all cancers in Panama.<sup>30</sup> A similar finding was seen in a population-based study conducted in the United States, in which costs of care for 18 different tumor sites were calculated using SEER and Medicare claims data from 1999 to 2003 (expressed as 2004 USD).<sup>55</sup>

The OMC of care per patient in our study was 4,259 USD, compared to the Chilean study that reported an OMC per patient of 3,706,145 Chilean pesos (CLP) (approximately 7,642 USD) for public health insurance regimes, and 3,102,978 CLP (approximately 6,398 USD) for private health insurance regimes.<sup>18</sup> The study conducted in the United States reported these costs by phases of care, reaching mean net costs as high as 46,501 USD in the initial phase (first 12 months after diagnosis), and 54,947 USD during the last year of life. On the other hand, in a 2015 cross-sectional study from Iran, the mean cost per patient was 2,596 USD.<sup>56</sup> Differences in OMC between studies might be explained by distinct definitions of types of care, since costs for a different range of services were included in each report.

Hospital admission accounted for the highest proportion of the total costs of care (51.8%), as reported previously.<sup>55</sup> Given the introduction of newer, costly chemotherapeutic agents in the latest years, and that a majority of patients in our study was reported with stage IV disease, one would expect chemotherapy to be accountable for the highest proportion of costs.<sup>57</sup> Nevertheless, underestimation of chemotherapy costs is likely, since we only included costs for medications and were not able to include other additional expenses related to chemotherapy sessions. Supporting this, according to previous local estimates, chemotherapy represented the highest institutional expenditure at the NOI in 2009.<sup>30</sup>

Women tend to have higher health resource utilization and expenditures than men.<sup>58</sup> This pattern, however, has not been reported for most tumor sites,<sup>55</sup> and was neither seen in our study. When assessing costs by tumor stage, some cancers may reflect higher costs with more advanced stages, but for cancers that are usually diagnosed in an advanced stage and with relatively short survival times as GC, differences in costs by stage are slighter,<sup>55</sup> as observed in our results. The greatest gap in OMC was observed when comparing social security status groups, with no statistically significant differences found. Even if offered the same standard of care, patients without social security accounted for a lower expenditure (3,657 USD) compared to those with social security (4,414 USD). In fact, in our study, patients without social security comprised only 20.4% of the patients receiving care, versus 79.6% patients who had social security. These disparities highlight the possibility that lack of social security and thus high out-of-pocket expenses are important barriers in

1  
2  
3 seeking care, resulting in lower healthcare utilization and therefore reflecting lower  
4 institutional expenditure in GC patients without social security.  
5

6  
7 To the best of our knowledge, this is the first study assessing baseline  
8 characteristics of patients with GC and costs related to its care in Panama. A key  
9 strength of this study was that mortality data was ascertained with the NMR. The use  
10 of actual chemotherapeutic doses administered allowed a more accurate calculation of  
11 medication costs, and using the bootstrap method for mean cost comparison purposes  
12 provided us with a more flexible tool to compare arithmetic mean costs, avoiding the  
13 assumptions and limitations inherent to other methods.<sup>59-61</sup>  
14  
15

16  
17 Several limitations deserve mention. This study encompassed patients from a  
18 single cancer institution and our results cannot be extrapolated to the whole  
19 population. However, the NOI is the biggest and main cancer referral public hospital in  
20 the country, where the majority of the cancer patients from all over the country are  
21 treated.<sup>4 5</sup> There was a considerable amount of underreporting and missing variables  
22 (e.g., *Helicobacter pylori* infection status, genetic factors), which have demonstrated  
23 to have a central role in disease outcomes. Lastly, incomplete data regarding  
24 chemotherapy protocol sessions, resource utilization and outpatient expenses, most  
25 likely led to underestimation of costs.  
26  
27  
28

29  
30 In conclusion, socioeconomic disparities strongly influence GC outcomes and  
31 healthcare utilization. Our results suggest the need for an in-depth characterization of  
32 the barriers in access to GC related services, particularly for diagnosis and to address  
33 geographical disparities, such as the one observed in the Veraguas province.  
34

35  
36 Given that efforts directed towards making earlier diagnoses have proven to  
37 reduce the gap in cancer survival between different socioeconomic groups,<sup>62</sup> health  
38 policies should move towards a more inclusive system for GC patients from lower  
39 socioeconomic strata. Further, building capacity training, boosting the investment in  
40 medical equipment and improving databases to have more accurate estimates of GC  
41 data in our population are strongly encouraged, including social security status in  
42 future studies evaluating cancer mortality in Panama.  
43

#### 44 Acknowledgements

45  
46 The authors would like to thank Fulvia Ibarra from the National Institute of Census  
47 and Statistics, Cecilio Niño from the Gorgas Memorial Institute for Health Studies, José  
48 Jiménez, head of the Department of Clinical Files at the NOI, Erick Trejos, head of the  
49 Department of Finance at the NOI and Dr. Reina Roa, Director of National Planning at  
50 the Ministry of Health of Panama.  
51  
52

#### 53 Footnotes

54  
55 Contributors: FC and DS curated, analyzed and interpreted the data, did the research,  
56 critically revised the draft for important intellectual content and wrote the draft of the  
57  
58  
59  
60

1  
2  
3 work. MT interpreted the data, did the research and critically revised the draft for  
4 important intellectual content. IMV analyzed and interpreted the data, did the  
5 research and critically revised the draft for important intellectual content and wrote  
6 the draft of the work. MTC, VH and MC interpreted the data, critically revised the draft  
7 for important intellectual content. BG and JM designed and supervised the work and  
8 critically revised the draft for important intellectual content. Final approval of the  
9 version to be published was given by FC, DS, MT, IMV, MTC, VH, BG, MC and JM. All the  
10 authors agree to be accountable for all aspects of the work in ensuring that questions  
11 related to the accuracy or integrity of any part of the work are appropriately  
12 investigated and resolved.  
13  
14  
15  
16

17 Funding: This research received no specific grant from any funding agency in the  
18 public, commercial or not-for-profit sectors.  
19

20 Competing interests: FC, DS, MT, IMV, VH, BG, MC, JM have completed the ICMJE  
21 uniform disclosure form at [www.icmje.org/coi\\_disclosure.pdf](http://www.icmje.org/coi_disclosure.pdf) and declare no conflicts  
22 of interest. MTC reports medical managing at Sanofi Pasteur, outside the submitted  
23 work.  
24  
25

26 Data sharing statement: No additional data are available.  
27  
28  
29

## 30 References

- 31  
32 1. Bonequi P, Meneses-González F, Correa P, et al. Risk factors for gastric cancer in Latin-America:  
33 a meta-analysis. *Cancer causes & control* : CCC 2013;24(2):217-31. doi: 10.1007/s10552-  
34 012-0110-z
- 35  
36 2. Registro Nacional de Cáncer [National Cancer Registry]. El cáncer en Panama, año 2011 [Cancer  
37 in Panama, year 2011] 2011 [Available from:  
38 [http://190.34.154.93/rncp/sites/all/files/rncp\\_2011\\_monografiadocx.pdf](http://190.34.154.93/rncp/sites/all/files/rncp_2011_monografiadocx.pdf) accessed  
39 02/10/2017.
- 40  
41 3. Mahar AL, El-Sedfy A, Brar SS, et al. Are We Lacking Economic Evaluations in Gastric Cancer  
42 Treatment? *Pharmacoeconomics* 2015;33(2):83-87. doi: 10.1007/s40273-014-0215-1
- 43  
44 4. Roquebert M, Palacios G, Ramos Y, et al. Barreras y oportunidades en la atención de salud en  
45 mujeres con cáncer de mama de la ciudad de Panamá. Año 2012. 2012 [Available from:  
46 <http://ww5.komen.org/uploadedFiles/Content/AboutUs/GlobalReach/Panama%20Health%20System%20Report.pdf> accessed 03/13/2017.
- 47  
48 5. Roquebert M, Ramos Y, Palacios G, et al. Estudio cualitativo, descriptivo para investigar barreras  
49 y oportunidades en la atención de salud de cáncer de mama en mujeres de las provincias  
50 de Chiriquí, Herrera, Los Santos, Veraguas y en mujeres indígenas de Panamá. Año 2014.  
51 2014 [Available from:  
52 [http://ww5.komen.org/uploadedFiles/\\_Komen/Content/Grants\\_Central/International\\_Grants/Grantee\\_Resources/HSR\\_Panama\\_2014.pdf](http://ww5.komen.org/uploadedFiles/_Komen/Content/Grants_Central/International_Grants/Grantee_Resources/HSR_Panama_2014.pdf) accessed 03/15/2017.
- 53  
54 6. Mikkelsen L, Phillips DE, AbouZahr C, et al. A global assessment of civil registration and vital  
55 statistics systems: monitoring data quality and progress: Elsevier; 2015 [1395-406].  
56 Available from: [http://dx.doi.org/10.1016/S0140-6736\(15\)60171-4](http://dx.doi.org/10.1016/S0140-6736(15)60171-4) accessed 10001 386.  
57  
58  
59  
60

- 1
  - 2
  - 3
  - 4
  - 5
  - 6
  - 7
  - 8
  - 9
  - 10
  - 11
  - 12
  - 13
  - 14
  - 15
  - 16
  - 17
  - 18
  - 19
  - 20
  - 21
  - 22
  - 23
  - 24
  - 25
  - 26
  - 27
  - 28
  - 29
  - 30
  - 31
  - 32
  - 33
  - 34
  - 35
  - 36
  - 37
  - 38
  - 39
  - 40
  - 41
  - 42
  - 43
  - 44
  - 45
  - 46
  - 47
  - 48
  - 49
  - 50
  - 51
  - 52
  - 53
  - 54
  - 55
  - 56
  - 57
  - 58
  - 59
  - 60
7. Milne AN, Offerhaus GJ. Early-onset gastric cancer: Learning lessons from the young. *World J Gastrointest Oncol* 2010;2(2):59-64. doi: 10.4251/wjgo.v2.i2.59
8. National Cancer Institute. SEER Stat Fact Sheets: Stomach Cancer 2015 [Available from: <http://seer.cancer.gov/statfacts/html/stomach.html>].
9. Social Security Administration. Social Security Programs Throughout the World: The Americas 2015 [Available from: <https://www.ssa.gov/policy/docs/progdesc/ssptw/2014-2015/americas/panama.html> accessed 01/31/17].
10. International Labour Office. Women and Men in the Informal Economy: A Statistical Picture Geneva, Switzerland 2013 [Second Edition:[Available from: [http://www.ilo.org/wcmsp5/groups/public/---dgreports/---stat/documents/publication/wcms\\_234413.pdf](http://www.ilo.org/wcmsp5/groups/public/---dgreports/---stat/documents/publication/wcms_234413.pdf) accessed 03/20/2017].
11. Instituto Nacional de Estadística y Censo. Estimación del Producto Interno Bruto Provincial, según categoría de actividad económica, a precios de 1996: Años 2003-05. 2006 [Available from: [https://www.contraloria.gob.pa/inec/publicaciones/Publicaciones.aspx?ID\\_SUBCATEGORIA=26&ID\\_PUBLICACION=63&ID\\_IDIOMA=1&ID\\_CATEGORIA=4](https://www.contraloria.gob.pa/inec/publicaciones/Publicaciones.aspx?ID_SUBCATEGORIA=26&ID_PUBLICACION=63&ID_IDIOMA=1&ID_CATEGORIA=4) accessed 02/10/2017].
12. Corral JE, Delgado Hurtado JJ, Domínguez RL, et al. The descriptive epidemiology of gastric cancer in Central America and comparison with United States Hispanic populations. *Journal of gastrointestinal cancer* 2015;46(1):21-28. doi: 10.1007/s12029-014-9672-1
13. Lauren P. THE TWO HISTOLOGICAL MAIN TYPES OF GASTRIC CARCINOMA: DIFFUSE AND SO-CALLED INTESTINAL-TYPE CARCINOMA. AN ATTEMPT AT A HISTO-CLINICAL CLASSIFICATION. *Acta pathologica et microbiologica Scandinavica* 1965;64:31-49. [published Online First: 1965/01/01]
14. Zheng H-c, Li X-h, Hara T, et al. Mixed-type gastric carcinomas exhibit more aggressive features and indicate the histogenesis of carcinomas. *Virchows Archiv* 2008;452(5):525-34. doi: 10.1007/s00428-007-0572-7
15. Kim SH, Ha TK, Kwon SJ. Evaluation of the 7th AJCC TNM Staging System in Point of Lymph Node Classification. *Journal of Gastric Cancer* 2011;11(2):94-100. doi: 10.5230/jgc.2011.11.2.94
16. Instituto Nacional de Estadística y Censo. Panamá en cifras 2014 [Available from: [https://www.contraloria.gob.pa/inec/Publicaciones/Publicaciones.aspx?ID\\_SUBCATEGORIA=45&ID\\_PUBLICACION=699&ID\\_IDIOMA=1&ID\\_CATEGORIA=17](https://www.contraloria.gob.pa/inec/Publicaciones/Publicaciones.aspx?ID_SUBCATEGORIA=45&ID_PUBLICACION=699&ID_IDIOMA=1&ID_CATEGORIA=17) accessed 05/19/2016].
17. Efron B, Tibshirani RJ. An Introduction to the Bootstrap (Chapman & Hall/CRC Monographs on Statistics & Applied Probability): Chapman and Hall/CRC 1994.
18. Cid C, Herrera C, Rodriguez R, et al. [Assessing the economic impact of cancer in Chile: a direct and indirect cost measurement based on 2009 registries]. *Medwave* 2016;16(7):e6509. doi: 10.5867/medwave.2016.07.6509 [published Online First: 2016/08/18]
19. Pereira L, Zamudio R, Soares-Souza G, et al. Socioeconomic and Nutritional Factors Account for the Association of Gastric Cancer with Amerindian Ancestry in a Latin American Admixed Population. *PloS one* 2012;7(8):e41200. doi: 10.1371/journal.pone.0041200
20. Shavers VL, Brown ML. Racial and Ethnic Disparities in the Receipt of Cancer Treatment. *JNCI: Journal of the National Cancer Institute* 2002;94(5):334-57. doi: 10.1093/jnci/94.5.334
21. Strasser-Weippl K, Chavarri-Guerra Y, Villarreal-Garza C, et al. Progress and remaining challenges for cancer control in Latin America and the Caribbean. *The Lancet Oncology* 2015;16(14):1405-38.
22. Ward E, Jemal A, Cokkinides V, et al. Cancer Disparities by Race/Ethnicity and Socioeconomic Status. *CA: a cancer journal for clinicians* 2004;54(2):78-93. doi: 10.3322/canjclin.54.2.78

- 1  
2  
3  
4  
5  
6  
7  
8  
9  
10  
11  
12  
13  
14  
15  
16  
17  
18  
19  
20  
21  
22  
23  
24  
25  
26  
27  
28  
29  
30  
31  
32  
33  
34  
35  
36  
37  
38  
39  
40  
41  
42  
43  
44  
45  
46  
47  
48  
49  
50  
51  
52  
53  
54  
55  
56  
57  
58  
59  
60
23. Kagawa-Singer M, Valdez Dadia A, Yu MC, et al. Cancer, Culture, and Health Disparities: Time to Chart a New Course? *CA: a cancer journal for clinicians* 2010;60(1):12-39. doi: 10.3322/caac.20051
  24. Social Security Fund. Social Security Coverage in Panama Panama2010 [Available from: <http://www.css.gob.pa/seguridadsocial/cobertura.html> accessed 02/14/2017.
  25. Bravo LE, Garcia LS, Collazos PA. Cancer survival in Cali, Colombia: A population-based study, 1995-2004. *Colombia medica* 2014;45(3):110-6.
  26. Roetzheim RG, Pal N, Tennant C, et al. Effects of health insurance and race on early detection of cancer. *Journal of the National Cancer Institute* 1999;91(16):1409-15.
  27. Kang S, Kwon YD, You CH, et al. The benefits of supplementary private health insurance for healthcare utilization and survival among stomach cancer patients. *The Tohoku journal of experimental medicine* 2009;217(3):243-50.
  28. Ljung R, Drefahl S, Andersson G, et al. Socio-demographic and geographical factors in esophageal and gastric cancer mortality in Sweden. *PloS one* 2013;8(4):e62067. doi: 10.1371/journal.pone.0062067
  29. de Boer AG, Bruinvels DJ, Tytgat KM, et al. Employment status and work-related problems of gastrointestinal cancer patients at diagnosis: a cross-sectional study. *BMJ open* 2011;1(2):e000190. doi: 10.1136/bmjopen-2011-000190
  30. Ministerio de Salud de Panamá [Panamanian Ministry of Health]. Plan Nacional para la Prevención y Control del Cáncer [National Plan for Prevention and Control of Cancer] 2010 - 2015 2011 [Available from: [http://190.34.154.93/rncp/sites/all/files/pnpcc\\_0.pdf](http://190.34.154.93/rncp/sites/all/files/pnpcc_0.pdf) accessed 2/21/17.
  31. National Institute of Statistics and Census. Panama in numbers: years 2010-2014 2014 [Available from: [https://www.contraloria.gob.pa/inec/Publicaciones/Publicaciones.aspx?ID\\_SUBCATEGORIA=45&ID\\_PUBLICACION=699&ID\\_IDIOMA=1&ID\\_CATEGORIA=17](https://www.contraloria.gob.pa/inec/Publicaciones/Publicaciones.aspx?ID_SUBCATEGORIA=45&ID_PUBLICACION=699&ID_IDIOMA=1&ID_CATEGORIA=17) accessed 05/19/2016.
  32. Gorgas Memorial Institute for Health Studies. Geographic Information System of Cancer Mortality and Incidence in Panama Panama2000-2013 [Available from: <http://www.gorgas.gob.pa/SIGCANCER/Inicio.htm> accessed 02/14/2017.
  33. Lee YY, Derakhshan MH. Environmental and lifestyle risk factors of gastric cancer. *Archives of Iranian medicine* 2013;16(6):358-65. doi: 013166/AIM.0010
  34. McLean MH, El-Omar EM. Genetics of gastric cancer. *Nature reviews Gastroenterology & hepatology* 2014;11(11):664-74. doi: 10.1038/nrgastro.2014.143
  35. Yamaoka Y, Kato M, Asaka M. Geographic differences in gastric cancer incidence can be explained by differences between *Helicobacter pylori* strains. *Internal medicine* 2008;47(12):1077-83.
  36. Yuan W, Yang N, Li X. Advances in Understanding How Heavy Metal Pollution Triggers Gastric Cancer. *BioMed research international* 2016;2016:7825432. doi: 10.1155/2016/7825432
  37. Roder DM. The epidemiology of gastric cancer. *Gastric cancer : official journal of the International Gastric Cancer Association and the Japanese Gastric Cancer Association* 2002;5 Suppl 1:5-11.
  38. Sierra MS, Cueva P, Bravo LE, et al. Stomach cancer burden in Central and South America. *Cancer epidemiology* 2016;44 Suppl 1:S62-S73. doi: 10.1016/j.canep.2016.03.008
  39. Ramos-De la Medina A, Salgado-Nesme N, Torres-Villalobos G, et al. Clinicopathologic characteristics of gastric cancer in a young patient population. *Journal of gastrointestinal surgery : official journal of the Society for Surgery of the Alimentary Tract* 2004;8(3):240-4. doi: 10.1016/j.gassur.2003.12.009

- 1  
2  
3 40. Heise K, Bertran E, Andia ME, et al. Incidence and survival of stomach cancer in a high-risk  
4 population of Chile. *World journal of gastroenterology* 2009;15(15):1854-62.  
5  
6 41. Hundahl SA, Phillips JL, Menck HR. The National Cancer Data Base Report on poor survival of  
7 U.S. gastric carcinoma patients treated with gastrectomy: Fifth Edition American Joint  
8 Committee on Cancer staging, proximal disease, and the "different disease" hypothesis.  
9 *Cancer* 2000;88(4):921-32.  
10 42. Rossi S, Cinini C, Di Pietro C, et al. Diagnostic delay in breast cancer: correlation with disease  
11 stage and prognosis. *Tumori* 1990;76(6):559-62. [published Online First: 1990/12/31]  
12 43. Dicken BJ, Bigam DL, Cass C, et al. Gastric adenocarcinoma: review and considerations for  
13 future directions. *Annals of surgery* 2005;241(1):27-39.  
14 44. Breslin NP, Thomson AB, Bailey RJ, et al. Gastric cancer and other endoscopic diagnoses in  
15 patients with benign dyspepsia. *Gut* 2000;46(1):93-7.  
16 45. Meineche-Schmidt V, Jorgensen T. 'Alarm symptoms' in patients with dyspepsia: a three-year  
17 prospective study from general practice. *Scandinavian journal of gastroenterology*  
18 2002;37(9):999-1007.  
19 46. Hallissey MT, Allum WH, Jewkes AJ, et al. Early detection of gastric cancer. *Bmj*  
20 1990;301(6751):513-5.  
21 47. Kim NY, Oh JS, Choi Y, et al. Relationship between socioeconomic status and accessibility for  
22 endoscopic resection among gastric cancer patients: using National Health Insurance  
23 Cohort in Korea: poverty and endoscopic resection. *Gastric cancer : official journal of the*  
24 *International Gastric Cancer Association and the Japanese Gastric Cancer Association*  
25 2017;20(1):61-69. doi: 10.1007/s10120-016-0597-1  
26 48. Lee HY, Park EC, Jun JK, et al. Trends in socioeconomic disparities in organized and  
27 opportunistic gastric cancer screening in Korea (2005-2009). *Cancer epidemiology,*  
28 *biomarkers & prevention : a publication of the American Association for Cancer Research,*  
29 *cosponsored by the American Society of Preventive Oncology* 2010;19(8):1919-26. doi:  
30 10.1158/1055-9965.EPI-09-1308  
31 49. Formenti SC, Meyerowitz BE, Ell K, et al. Inadequate adherence to radiotherapy in Latina  
32 immigrants with carcinoma of the cervix. Potential impact on disease free survival. *Cancer*  
33 1995;75(5):1135-40.  
34 50. Kelley JR, Duggan JM. Gastric cancer epidemiology and risk factors. *Journal of clinical*  
35 *epidemiology* 2003;56(1):1-9.  
36 51. Shah MA, Khanin R, Tang L, et al. Molecular classification of gastric cancer: a new paradigm.  
37 *Clinical cancer research : an official journal of the American Association for Cancer*  
38 *Research* 2011;17(9):2693-701. doi: 10.1158/1078-0432.CCR-10-2203  
39 52. Shibata A, Longacre TA, Puligandla B, et al. Histological classification of gastric adenocarcinoma  
40 for epidemiological research: concordance between pathologists. *Cancer epidemiology,*  
41 *biomarkers & prevention : a publication of the American Association for Cancer Research,*  
42 *cosponsored by the American Society of Preventive Oncology* 2001;10(1):75-8.  
43 53. Yuasa Y. Control of gut differentiation and intestinal-type gastric carcinogenesis. *Nature*  
44 *reviews Cancer* 2003;3(8):592-600. doi: 10.1038/nrc1141  
45 54. Yang D, Hendifar A, Lenz C, et al. Survival of metastatic gastric cancer: Significance of age, sex  
46 and race/ethnicity. *Journal of gastrointestinal oncology* 2011;2(2):77-84. doi:  
47 10.3978/j.issn.2078-6891.2010.025  
48 55. Yabroff KR, Lamont EB, Mariotto A, et al. Cost of care for elderly cancer patients in the United  
49 States. *Journal of the National Cancer Institute* 2008;100(9):630-41. doi:  
50 10.1093/jnci/djn103 [published Online First: 2008/05/01]  
51  
52  
53  
54  
55  
56  
57  
58  
59  
60



- 1  
2  
3  
4  
5  
6  
7  
8  
9  
10  
11  
12  
13  
14  
15  
16  
17  
18  
19  
20  
21  
22  
23  
24  
25  
26  
27  
28  
29  
30  
31  
32  
33  
34  
35  
36  
37  
38  
39  
40  
41  
42  
43  
44  
45  
46  
47  
48  
49  
50  
51  
52  
53  
54  
55  
56  
57  
58  
59  
60
56. Izadi A, Sirizi MJ, Esmaeelpour S, et al. Evaluating Direct Costs of Gastric Cancer Treatment in Iran - Case Study in Kerman City in 2015. *Asian Pacific journal of cancer prevention : APJCP* 2016;17(6):3007-13. [published Online First: 2016/07/01]
57. Gómez B, Gordón C, Herrera V, et al. Gasto, Acceso y Disponibilidad de los Medicamentos en Panamá, 2007-2012: documento diagnóstico [Expenditure, access and availability of medications in Panama, 2007-2012: diagnostic report]. 2014 [Available from: [http://siproy.mef.gob.pa/tab/15817\\_2010\\_24212\\_InformeMedicamentos.pdf](http://siproy.mef.gob.pa/tab/15817_2010_24212_InformeMedicamentos.pdf) accessed 02/10/2017.
58. Owens GM. Gender differences in health care expenditures, resource utilization, and quality of care. *Journal of managed care pharmacy : JMCP* 2008;14(3 Suppl):2-6. doi: 10.18553/jmcp.2008.14.S6-A.2 [published Online First: 2008/05/24]
59. Barber JA, Thompson SG. Analysis of cost data in randomized trials: an application of the non-parametric bootstrap. *Statistics in medicine* 2000;19(23):3219-36. [published Online First: 2000/12/13]
60. Mani K, Bjorck M, Lundkvist J, et al. Similar cost for elective open and endovascular AAA repair in a population-based setting. *Journal of endovascular therapy : an official journal of the International Society of Endovascular Specialists* 2008;15(1):1-11. doi: 10.1583/07-2258.1 [published Online First: 2008/02/08]
61. Mani K, Lundkvist J, Holmberg L, et al. Challenges in analysis and interpretation of cost data in vascular surgery. *Journal of vascular surgery* 2010;51(1):148-54. doi: 10.1016/j.jvs.2009.08.042 [published Online First: 2009/11/06]
62. Li R, Daniel R, Rachet B. How much do tumor stage and treatment explain socioeconomic inequalities in breast cancer survival? Applying causal mediation analysis to population-based data. *European journal of epidemiology* 2016;31(6):603-11. doi: 10.1007/s10654-016-0155-5

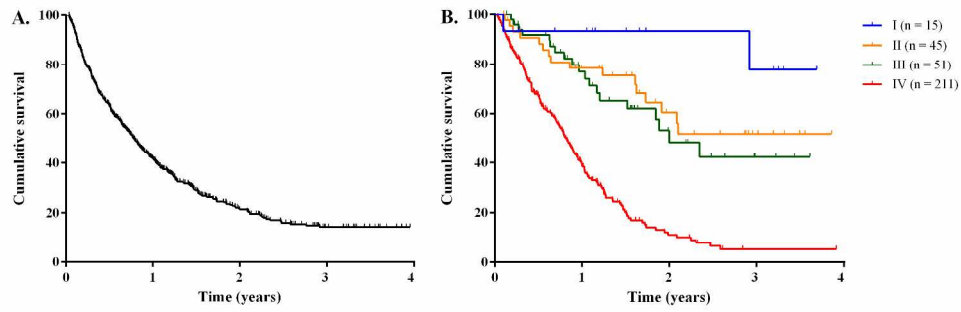

**Figure 1.** Kaplan-Meier plots for overall survival (A) and stage specific survival (B) for patients with gastric cancer treated at the NOI, 2012-2015.

270x95mm (300 x 300 DPI)

Peer review only

**Supplementary Table 1.** Socioeconomic variables of patients with gastric cancer lost to follow up for receiving any type of care. 2012-2015.

| Socioeconomic and clinical variables | n     | %    |
|--------------------------------------|-------|------|
| Sex                                  |       |      |
| Female                               | 31/87 | 35.6 |
| Male                                 | 56/87 | 64.4 |
| Age                                  |       |      |
| Less than 45 years                   | 4/87  | 4.6  |
| 45-64 years                          | 19/87 | 21.8 |
| 65-74 years                          | 25/87 | 28.7 |
| 75 years or more                     | 39/87 | 44.8 |
| Social security status               |       |      |
| With social security                 | 56/87 | 64.4 |
| Without social security              | 31/87 | 35.6 |
| Employment status                    |       |      |
| Formal employment                    | 7/87  | 8.0  |
| Informal employment                  | 15/87 | 17.2 |
| Retired/pensioner                    | 28/87 | 32.2 |
| Unemployed                           | 37/87 | 42.5 |
| Marital status                       |       |      |
| Married/common law marriage          | 53/87 | 60.9 |
| Single                               | 25/87 | 28.7 |
| Widowed                              | 9/87  | 10.3 |
| Province of residence                |       |      |
| Panama and Colon                     | 49/87 | 56.3 |
| Veraguas and Coclé                   | 23/87 | 26.4 |
| Herrera and Los Santos               | 12/87 | 13.8 |
| Other provinces <sup>a</sup>         | 3/87  | 3.4  |
| Ethnicity                            |       |      |
| White                                | 9/87  | 10.3 |
| Mestizo                              | 74/87 | 85.1 |
| Afrocaribbean                        | 2/87  | 2.3  |
| Indigenous                           | 2/87  | 2.3  |

<sup>a</sup>Other provinces: 1 from Chiriqui and 2 from Darien.

Supplementary Figure 1. Schematic diagram showing sample selection.

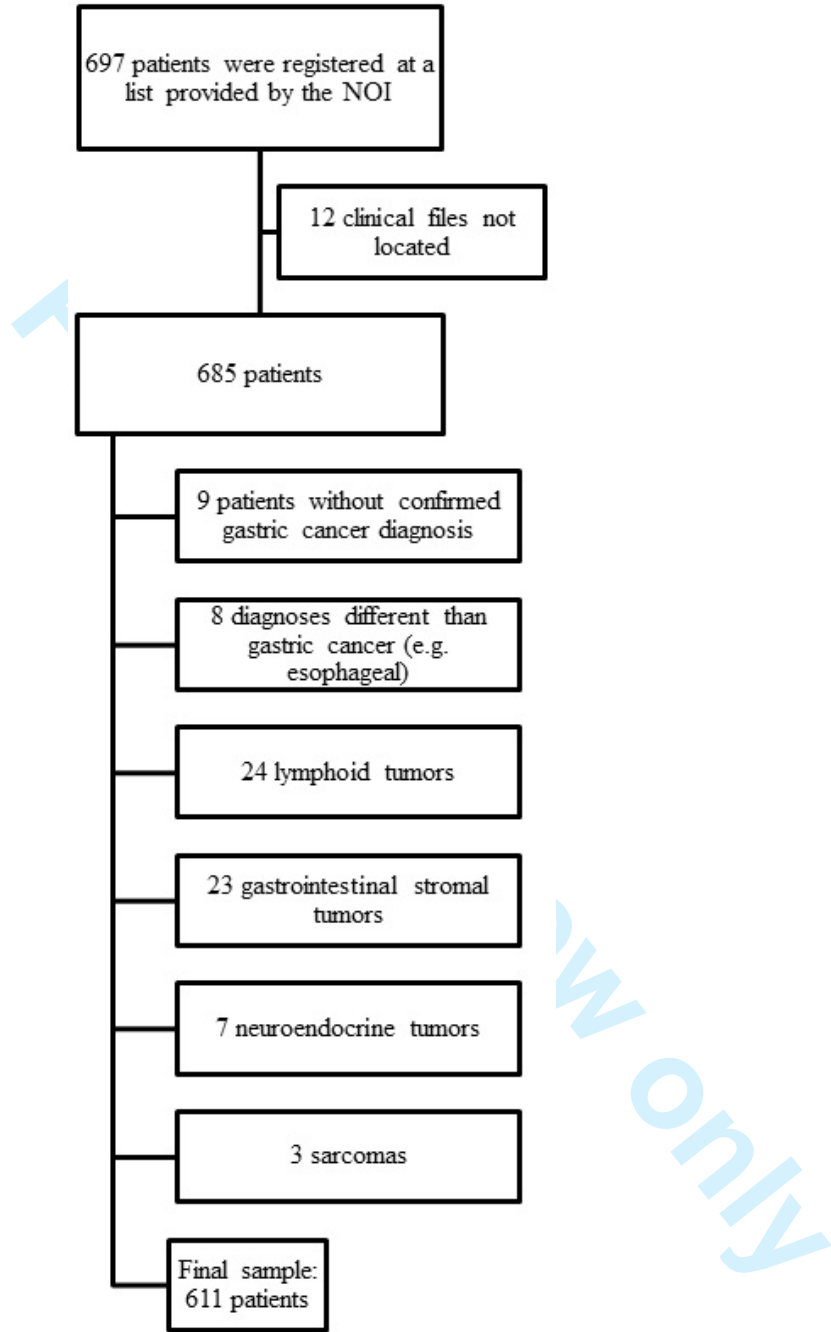

**Supplementary Figure 2.** Frequency distribution of costs of care according to socioeconomic and clinical variables.



STROBE 2007 (v4) Statement—Checklist of items that should be included in reports of *cross-sectional studies*

| Section/Topic             | Item # | Recommendation                                                                                                                                                                       | Reported on page # |
|---------------------------|--------|--------------------------------------------------------------------------------------------------------------------------------------------------------------------------------------|--------------------|
| Title and abstract        | 1      | (a) Indicate the study’s design with a commonly used term in the title or the abstract                                                                                               | 1-2                |
|                           |        | (b) Provide in the abstract an informative and balanced summary of what was done and what was found                                                                                  | 2                  |
| <b>Introduction</b>       |        |                                                                                                                                                                                      |                    |
| Background/rationale      | 2      | Explain the scientific background and rationale for the investigation being reported                                                                                                 | 4                  |
| Objectives                | 3      | State specific objectives, including any prespecified hypotheses                                                                                                                     | 4                  |
| <b>Methods</b>            |        |                                                                                                                                                                                      |                    |
| Study design              | 4      | Present key elements of study design early in the paper                                                                                                                              | 4                  |
| Setting                   | 5      | Describe the setting, locations, and relevant dates, including periods of recruitment, exposure, follow-up, and data collection                                                      | 4                  |
| Participants              | 6      | (a) Give the eligibility criteria, and the sources and methods of selection of participants                                                                                          | 4                  |
| Variables                 | 7      | Clearly define all outcomes, exposures, predictors, potential confounders, and effect modifiers. Give diagnostic criteria, if applicable                                             | 5                  |
| Data sources/ measurement | 8*     | For each variable of interest, give sources of data and details of methods of assessment (measurement). Describe comparability of assessment methods if there is more than one group | 5                  |
| Bias                      | 9      | Describe any efforts to address potential sources of bias                                                                                                                            | 5-6                |
| Study size                | 10     | Explain how the study size was arrived at                                                                                                                                            | 4                  |
| Quantitative variables    | 11     | Explain how quantitative variables were handled in the analyses. If applicable, describe which groupings were chosen and why                                                         | 6                  |
| Statistical methods       | 12     | (a) Describe all statistical methods, including those used to control for confounding                                                                                                | 6                  |
|                           |        | (b) Describe any methods used to examine subgroups and interactions                                                                                                                  | 6                  |
|                           |        | (c) Explain how missing data were addressed                                                                                                                                          | 4-6                |
|                           |        | (d) If applicable, describe analytical methods taking account of sampling strategy                                                                                                   | 6                  |
|                           |        | (e) Describe any sensitivity analyses                                                                                                                                                | 6                  |
| <b>Results</b>            |        |                                                                                                                                                                                      |                    |

|                          |     |                                                                                                                                                                                                              |            |
|--------------------------|-----|--------------------------------------------------------------------------------------------------------------------------------------------------------------------------------------------------------------|------------|
| Participants             | 13* | (a) Report numbers of individuals at each stage of study—eg numbers potentially eligible, examined for eligibility, confirmed eligible, included in the study, completing follow-up, and analysed            | 6-8        |
|                          |     | (b) Give reasons for non-participation at each stage                                                                                                                                                         | 6-8        |
|                          |     | (c) Consider use of a flow diagram                                                                                                                                                                           |            |
| Descriptive data         | 14* | (a) Give characteristics of study participants (eg demographic, clinical, social) and information on exposures and potential confounders                                                                     | 6-8        |
|                          |     | (b) Indicate number of participants with missing data for each variable of interest                                                                                                                          | 6-8        |
| Outcome data             | 15* | Report numbers of outcome events or summary measures                                                                                                                                                         | 6-8        |
| Main results             | 16  | (a) Give unadjusted estimates and, if applicable, confounder-adjusted estimates and their precision (eg, 95% confidence interval). Make clear which confounders were adjusted for and why they were included | 8-9        |
|                          |     | (b) Report category boundaries when continuous variables were categorized                                                                                                                                    | 6, 10-11   |
|                          |     | (c) If relevant, consider translating estimates of relative risk into absolute risk for a meaningful time period                                                                                             |            |
| Other analyses           | 17  | Report other analyses done—eg analyses of subgroups and interactions, and sensitivity analyses                                                                                                               | 8-9, 10-11 |
| <b>Discussion</b>        |     |                                                                                                                                                                                                              |            |
| Key results              | 18  | Summarise key results with reference to study objectives                                                                                                                                                     | 11         |
| Limitations              | 19  | Discuss limitations of the study, taking into account sources of potential bias or imprecision. Discuss both direction and magnitude of any potential bias                                                   | 11-15      |
| Interpretation           | 20  | Give a cautious overall interpretation of results considering objectives, limitations, multiplicity of analyses, results from similar studies, and other relevant evidence                                   | 11-15      |
| Generalisability         | 21  | Discuss the generalisability (external validity) of the study results                                                                                                                                        | 11-15      |
| <b>Other information</b> |     |                                                                                                                                                                                                              |            |
| Funding                  | 22  | Give the source of funding and the role of the funders for the present study and, if applicable, for the original study on which the present article is based                                                | 15         |

\*Give information separately for cases and controls in case-control studies and, if applicable, for exposed and unexposed groups in cohort and cross-sectional studies.

**Note:** An Explanation and Elaboration article discusses each checklist item and gives methodological background and published examples of transparent reporting. The STROBE checklist is best used in conjunction with this article (freely available on the Web sites of PLoS Medicine at <http://www.plosmedicine.org/>, Annals of Internal Medicine at <http://www.annals.org/>, and Epidemiology at <http://www.epidem.com/>). Information on the STROBE Initiative is available at [www.strobe-statement.org](http://www.strobe-statement.org).
