# Supplementary material for: Baseline characteristics, survival and direct costs associated to treatment of gastric cancer patients at the National Oncology Institute of Panama from 2012 to 2015: a hospital-based observational study
Source: PubMed Central journal article supplement — BMJ Open. 2017 Sep 24;7(9):e017266. doi: 10.1136/bmjopen-2017-017266 (PMC5623512; doi:10.1136/bmjopen-2017-017266), 2017-09-24
Supplement: bmjopen-2017-017266supp002.pdf [file bmjopen-2017-017266supp002.pdf]

**Supplementary Table 1.** Socioeconomic variables of patients with gastric cancer lost to follow up for receiving any type of care. 2012-2015.

| Socioeconomic and clinical variables | n     | %    |
|--------------------------------------|-------|------|
| Sex                                  |       |      |
| Female                               | 31/87 | 35.6 |
| Male                                 | 56/87 | 64.4 |
| Age                                  |       |      |
| Less than 45 years                   | 4/87  | 4.6  |
| 45-64 years                          | 19/87 | 21.8 |
| 65-74 years                          | 25/87 | 28.7 |
| 75 years or more                     | 39/87 | 44.8 |
| Social security status               |       |      |
| With social security                 | 56/87 | 64.4 |
| Without social security              | 31/87 | 35.6 |
| Employment status                    |       |      |
| Formal employment                    | 7/87  | 8.0  |
| Informal employment                  | 15/87 | 17.2 |
| Retired/pensioner                    | 28/87 | 32.2 |
| Unemployed                           | 37/87 | 42.5 |
| Marital status                       |       |      |
| Married/common law marriage          | 53/87 | 60.9 |
| Single                               | 25/87 | 28.7 |
| Widowed                              | 9/87  | 10.3 |
| Province of residence                |       |      |
| Panama and Colon                     | 49/87 | 56.3 |
| Veraguas and Coclé                   | 23/87 | 26.4 |
| Herrera and Los Santos               | 12/87 | 13.8 |
| Other provinces <sup>a</sup>         | 3/87  | 3.4  |
| Ethnicity                            |       |      |
| White                                | 9/87  | 10.3 |
| Mestizo                              | 74/87 | 85.1 |
| Afrocaribbean                        | 2/87  | 2.3  |
| Indigenous                           | 2/87  | 2.3  |

<sup>a</sup>Other provinces: 1 from Chiriqui and 2 from Darien.
