# Supplementary figures and images for: Baseline characteristics, survival and direct costs associated to treatment of gastric cancer patients at the National Oncology Institute of Panama from 2012 to 2015: a hospital-based observational study
Source: PubMed Central journal article supplement — BMJ Open. 2017 Sep 24;7(9):e017266. doi: 10.1136/bmjopen-2017-017266 (PMC5623512; doi:10.1136/bmjopen-2017-017266), 2017-09-24

**Supplementary Figure 1.** Schematic diagram showing sample selection.

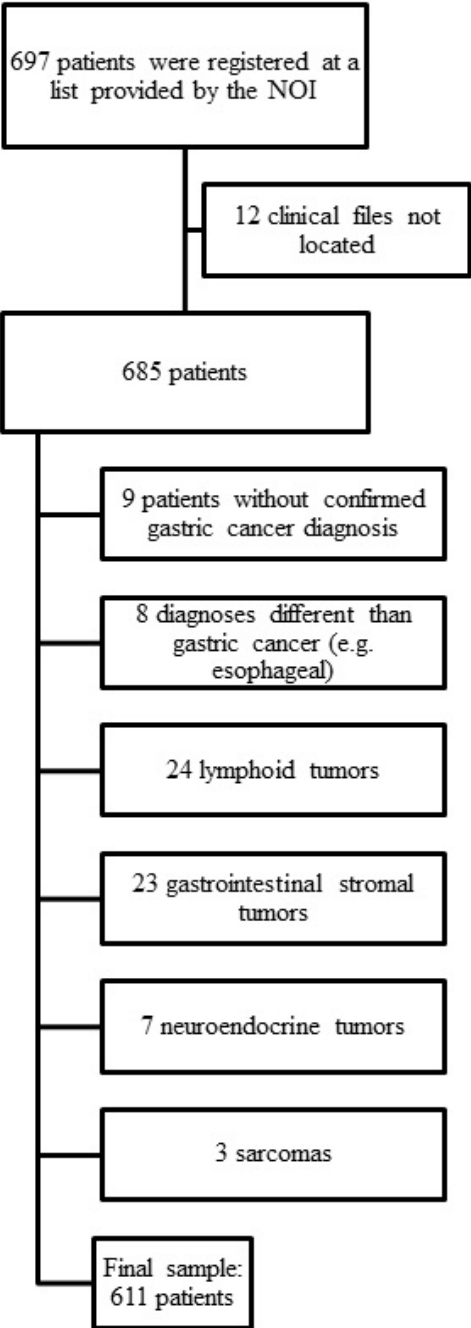

Supplement: bmjopen-2017-017266supp001.pdf [file bmjopen-2017-017266supp001.pdf]
